# Supplementary material for: Viral Decoys: The Only Two Herpesviruses Infecting Invertebrates Evolved Different Transcriptional Strategies to Deflect Post-Transcriptional Editing
Source: Viruses. 2021 Sep 30;13(10):1971. doi: 10.3390/v13101971 (PMC8537636; doi:10.3390/v13101971)
Supplement: Supplementary file 1 [file viruses-13-01971-s001.zip]

Archive with 9 entries (9 files):
- Figure S1.pdf
- Figure S2.pdf
- Figure S3.pdf
- Figure S4.pdf
- supplementary data.zip
- Table S1.pdf
- Table S2.xlsx
- Table S3.xlsx
- Table S4.xlsx
