# Supplementary material for: Viral Decoys: The Only Two Herpesviruses Infecting Invertebrates Evolved Different Transcriptional Strategies to Deflect Post-Transcriptional Editing
Source: Viruses. 2021 Sep 30;13(10):1971. doi: 10.3390/v13101971 (PMC8537636; doi:10.3390/v13101971)
Supplement: Supplementary file 1 [file viruses-13-01971-s001.zip › Figure S1.pdf]

Supplementary Information 3. Malacoherpesvirus genome reconstruction by DNA-seq.

Level of similarity between HaHV-1-CN2003, OsHV-1-CN2017 and 8 available Malacoherpesvirus genomes. Similarities were computed as Average Nucleotide Identity (ANI, upper comparison) and Alignment Percentage (AP, lower comparison).

List of considered genomes:

|                   |            |                                       |
|-------------------|------------|---------------------------------------|
| AY509253_2005     | AY509253   | Ostreid herpesvirus 1                 |
| GQ153938_ANVN     | GQ153938   | Chlamys acute necrobiotic virus       |
| KP412538_China    | KP412538   | Ostreid herpesvirus 1                 |
| KU096999_Taiwan   | KU096999   | Abalone herpesvirus Taiwan/2005       |
| KY242785_uVAR     | KY242785   | Ostreid herpesvirus 1                 |
| KY271630_uVAR     | KY271630   | Ostreid herpesvirus 1                 |
| MG561751_Italy    | MG561751   | Ostreid herpesvirus 1                 |
| NC018874_Victoria | NC_018874  | Abalone herpesvirus Victoria/AUS/2009 |
| OsHV-1-CN2017     | this paper | Ostreid herpesvirus 1                 |
| HaHV-1-CN2003     | this paper | Abalone herpesvirus                   |

|                   |    |       |       |       |       |       |       |       |       |       |       |
|-------------------|----|-------|-------|-------|-------|-------|-------|-------|-------|-------|-------|
|                   |    | 1     | 2     | 3     | 4     | 5     | 6     | 7     | 8     | 9     | 10    |
| NC018874_Victoria | 1  |       | 43.02 | 42.64 | 42.38 | 42.38 | 42.84 | 41.85 | 98.70 | 41.86 | 97.69 |
| GQ153938_ANVN     | 2  | 35.67 |       | 99.72 | 99.60 | 99.60 | 99.63 | 99.36 | 43.96 | 99.38 | 43.15 |
| AY509253_2005     | 3  | 35.47 | 84.37 |       | 99.73 | 99.73 | 99.76 | 99.48 | 43.64 | 98.76 | 42.86 |
| KY242785_uVAR     | 4  | 37.65 | 82.91 | 83.01 |       | 99.96 | 99.96 | 99.11 | 43.38 | 98.40 | 42.20 |
| KY271630_uVAR     | 5  | 37.66 | 82.87 | 82.34 | 86.67 |       | 99.96 | 99.11 | 43.37 | 99.13 | 42.20 |
| MG561751_Italy    | 6  | 36.81 | 79.56 | 79.00 | 82.31 | 82.31 |       | 99.58 | 44.33 | 99.61 | 43.08 |
| KP412538_China    | 7  | 39.07 | 84.60 | 84.02 | 85.39 | 85.39 | 82.49 |       | 43.05 | 99.94 | 42.14 |
| KU096999_Taiwan   | 8  | 89.29 | 36.33 | 36.22 | 38.10 | 38.09 | 37.19 | 39.52 |       | 42.93 | 99.60 |
| OsHV-1-CN2017     | 9  | 38.70 | 84.40 | 83.26 | 84.64 | 84.62 | 81.71 | 99.01 | 39.43 |       | 42.04 |
| HaHV-1-CN2003     | 10 | 88.95 | 35.76 | 35.67 | 37.71 | 37.70 | 36.84 | 39.11 | 91.02 | 39.01 |       |

Neighbor Joining tree based on whole genome alignment (ANI values) of Malacoherpesvirus genomes.

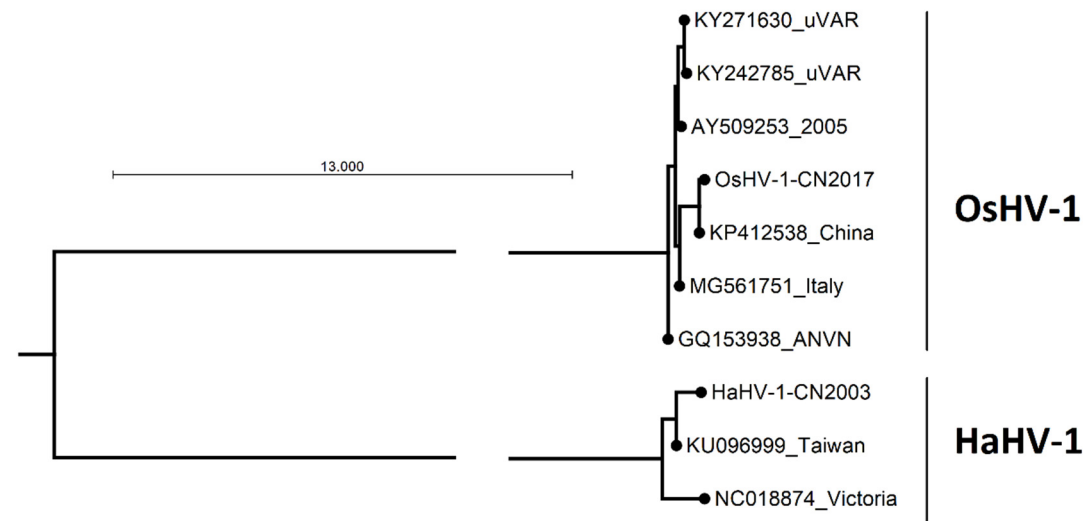

Comparison of the malacoherpesvirus genomic structures with archetypical herpesviruses.

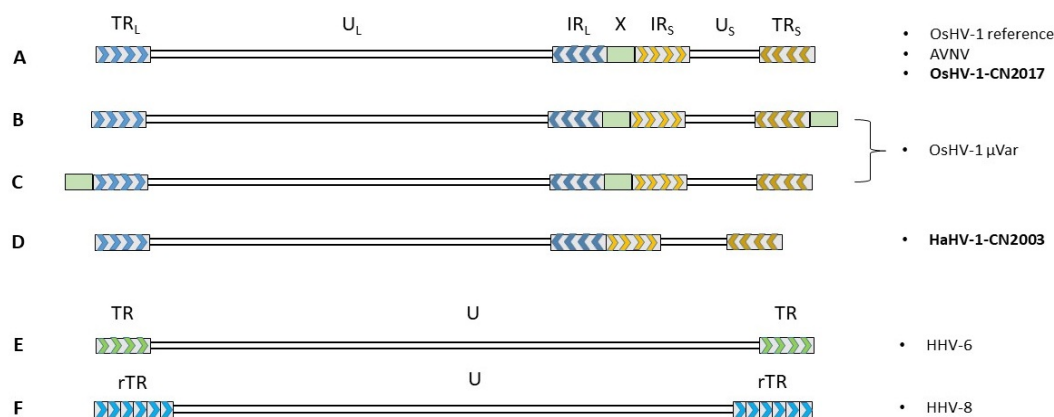

There are 4 typical sequence arrangements of herpesvirus genomes<sup>1</sup> (S. Figure 1). OsHV-1 genomes are composed of relatively complex elements, including two unique regions ( $U_L/U_S$ ) that flanked by two pairs of inverted repeats ( $TR_L/IR_L$  and  $TR_S/IR_S$ ) and separated by the X region (S. Figure 1, group A, B and C)<sup>2</sup>. Similar genomic architecture were found in variants infected Chinese scallops (AVNV)<sup>3</sup> and blood clam (OsHV-1-SB)<sup>4</sup>, with the exception that X region was not detected in OsHV-1-SB. Since OsHV-1-SB genome was resolved through a PCR-based approach with primers designed based on OsHV-1 reference, we cannot exclude the possibility that the X region existed in OsHV-1-SB but missed due to variation in primer locus. Using HTS DNA-seq, we reanalyzed the genome sequence of OsHV-1 infecting *S. broughtonii* (OsHV-1-CN2017) and found a similar genome structure with a X region of 3.8kb, considerably longer than typical OsHV-1 X region (1.5kb). Two studies on OsHV-1- $\mu$ Var genomes suggested that there are two copies of X along the genome<sup>5,6</sup>. Despite the variations, the genomic structure of OsHV-1 resembled that of human herpesvirus 1 (family *Herpesviridae*, subfamily *Alphaherpesvirinae*) and human herpesvirus 5 (HHV-5; family *Herpesviridae*, subfamily *Betaherpesvirinae*)<sup>1</sup>. The genome structure of HaHV-1-CN2003 is relatively simple, designed as  $TR_L-U_L-IR_L-IR_S-U_S-TR_S$  (Figure 1, group D), also resembling that of human herpesvirus 1 (subfamily *Alphaherpesvirinae*). There other classes of genomic structures are characterized by a unique sequence flanked by a direct repeat, e.g. human herpesvirus 6 (family *Herpesviridae*, subfamily *Betaherpesvirinae*, S. Figure 1, group E) or by a single unique sequence flanked by a variable number of repeated sequences at each terminus, e.g. human herpesvirus 8 (family *Herpesviridae*, subfamily *Alphaherpesvirinae*, S. Figure 1, group F).

1. Lefkowitz, E. J. *et al.* Virus taxonomy: the database of the International Committee on Taxonomy of Viruses (ICTV). *Nucleic Acids Res* **46**, D708–D717 (2018).
2. Davison, A. J. *et al.* A novel class of herpesvirus with bivalve hosts. *J. Gen. Virol.* **86**, 41–53 (2005).
3. Ren, W. *et al.* Complete genome sequence of acute viral necrosis virus associated with massive mortality outbreaks in the Chinese scallop, *Chlamys farreri*. *Virol. J.* **10**, 110 (2013).
4. Xia, J., Bai, C., Wang, C., Song, X. & Huang, J. Complete genome sequence of Ostreid herpesvirus-1 associated with mortalities of *Scapharca broughtonii* broodstocks. *Virol J* **12**, (2015).
5. Abbadi, M. *et al.* Identification of a newly described OsHV-1  $\mu$ var from the North Adriatic Sea (Italy). *J. Gen. Virol.* (2018) doi:10.1099/jgv.0.001042.
6. Burioli, E. a. V., Prearo, M. & Houssin, M. Complete genome sequence of Ostreid herpesvirus type 1  $\mu$ Var isolated during mortality events in the Pacific oyster *Crassostrea gigas* in France and Ireland. *Virology* **509**, 239–251 (2017).
