# Supplementary material for: Viral Decoys: The Only Two Herpesviruses Infecting Invertebrates Evolved Different Transcriptional Strategies to Deflect Post-Transcriptional Editing
Source: Viruses. 2021 Sep 30;13(10):1971. doi: 10.3390/v13101971 (PMC8537636; doi:10.3390/v13101971)
Supplement: Supplementary file 1 [file viruses-13-01971-s001.zip › Figure S4.pdf]

**Supplementary Information 9. SNP analysis.**

The Number of viral SNPs are reported for HaHV-1 (a) and OsHV-1 (b). Black boxes represented SNPs other than A-to-G and T-to-C (shown as white boxes). For the HaHV-1 graph, the samples denoted by a “\_S” are the re-sequenced samples with stranded library layout. The red vertical lines separated logarithmic and stationary phases of viral replication. The raw data are included in the table below.

The conservation of the variable positions is reported for the 2,561 HaHV-1 ADAR-compatible SNP (c) and for the 3,062 OsHV-1 ones (d).

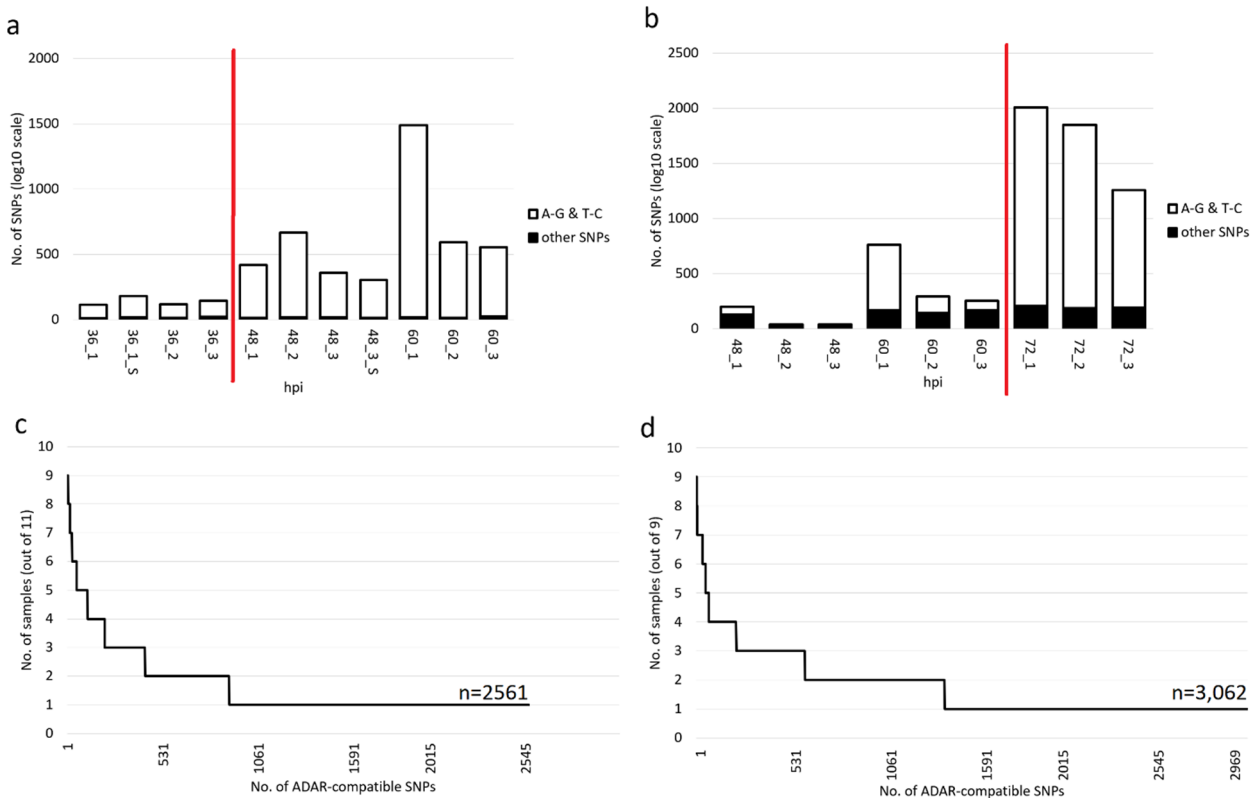

**e.** Data table. The number of total SNPs, other SNPs, ADAR-compatible SNPs, the mean frequency of ADAR SNPs and the percentages of ADAR-compatible SNPs over total SNPs are reported.

| HaHV-1 | total<br>SNP | other | ADAR-<br>SNP | freq | % of ADAR-<br>SNP |
|--------|--------------|-------|--------------|------|-------------------|
| 6_1    |              |       |              |      |                   |
| 6_2    | 1            | 1     |              |      |                   |
| 6_3    |              |       |              |      |                   |
| 12_1   |              |       |              |      |                   |
| 12_2   |              |       |              |      |                   |
| 12_3   |              |       |              |      |                   |
| 24_1   | 1            | 1     |              |      |                   |
| 24_2   | 11           | 7     | 4            |      | 36,36             |
| 24_3   | 7            | 6     | 1            |      | 14,29             |
| 36_1   | 115          | 10    | 105          | 4,8  | 91,30             |
| 36_1_S | 179          | 17    | 162          | 3,23 | 90,50             |
| 36_2   | 116          | 15    | 101          | 4,35 | 87,07             |
| 36_3   | 143          | 21    | 122          | 3,7  | 85,31             |
| 48_1   | 416          | 14    | 402          | 1,95 | 96,63             |
| 48_2   | 664          | 18    | 646          | 2    | 97,29             |
| 48_3   | 358          | 16    | 342          | 2,12 | 95,53             |
| 48_3_S | 303          | 13    | 290          | 2,4  | 95,71             |
| 60_1   | 1489         | 16    | 1473         | 2,17 | 98,93             |
| 60_2   | 591          | 15    | 576          | 1,92 | 97,46             |
| 60_3   | 553          | 23    | 530          | 2,07 | 95,84             |

| OsHV-1 | total<br>SNP | other | ADAR-<br>SNP | freq | % of ADAR-<br>SNP |
|--------|--------------|-------|--------------|------|-------------------|
| 6_1    |              |       |              |      |                   |
| 6_2    |              |       |              |      |                   |
| 6_3    |              |       |              |      |                   |
| 12_1   |              |       |              |      |                   |
| 12_2   |              |       |              |      |                   |
| 12_3   |              |       |              |      |                   |
| 24_1   |              |       |              |      |                   |
| 24_2   |              |       |              |      |                   |
| 24_3   |              |       |              |      |                   |
| 36_1   |              |       |              |      |                   |
| 36_2   |              |       |              |      |                   |
| 36_3   |              |       |              |      |                   |
| 48_1   | 203          | 129   | 74           | 25,4 | 36,45             |
| 48_2   | 36           | 33    | 3            | 23,8 | 8,33              |
| 48_3   | 41           | 34    | 7            | 23,5 | 17,07             |
| 60_1   | 762          | 172   | 590          | 7,2  | 77,43             |
| 60_2   | 294          | 145   | 149          | 15,7 | 50,68             |
| 60_3   | 255          | 169   | 86           | 26,8 | 33,73             |
| 72_1   | 2008         | 209   | 1799         | 3,73 | 89,59             |
| 72_2   | 1850         | 190   | 1660         | 3,6  | 89,73             |
| 72_3   | 1257         | 191   | 1066         | 5,08 | 84,81             |
