# Supplementary material for: Viral Decoys: The Only Two Herpesviruses Infecting Invertebrates Evolved Different Transcriptional Strategies to Deflect Post-Transcriptional Editing
Source: Viruses. 2021 Sep 30;13(10):1971. doi: 10.3390/v13101971 (PMC8537636; doi:10.3390/v13101971)
Supplement: Supplementary file 1 [file viruses-13-01971-s001.zip › Table S1.pdf]

**Supplementary Information 1.** Details of the sequencing datasets produced for this study. Species, the sequencing approach and technology, the number of sequenced samples, the number of sequenced nucleotides, the downstream applications and the accession IDs in the NCBI SRA archive were reported.

| Species                                                          | Approach | Technology         | No. of samples | No. of sequenced bases | Application                                                  | Accession ID (SRA archive) |
|------------------------------------------------------------------|----------|--------------------|----------------|------------------------|--------------------------------------------------------------|----------------------------|
| <i>H. diversicolor</i><br>(gastropod)<br>infected with<br>HaHV-1 | DNA-seq  | Illumina, 2x350 bp | 1              | 116 Gb                 | HaHV-1 genome assembly                                       | PRJNA679801                |
|                                                                  | RNA-seq  | Illumina, 2x150 bp | 20             | 168 Gb                 | Evaluation of HaHV-1 transcriptional levels                  | PRJNA592737                |
|                                                                  | RNA-seq  | PacBio, SMRT       | 2              | 44.9 Gb                | HaHV-1 transcriptome annotation and transcriptional dynamics | PRJNA592736                |
| <i>S. broughtonii</i><br>(bivalve)<br>infected with<br>OSHV-1    | DNA-seq  | Illumina, 2x350 bp | 1              | 166 Gb                 | OsHV-1 genome assembly                                       | PRJNA679800                |
|                                                                  | RNA-seq  | Illumina, 2x150 bp | 21             | 338 Gb                 | Evaluation of OsHV-1 transcriptional levels                  | PRJNA628528                |
|                                                                  | RNA-seq  | PacBio, SMRT       | 2              | 83.9 Gb                | OsHV-1 transcriptome annotation and transcriptional dynamics | PRJNA628527                |
