# Supplementary material for: Viral Decoys: The Only Two Herpesviruses Infecting Invertebrates Evolved Different Transcriptional Strategies to Deflect Post-Transcriptional Editing
Source: Viruses. 2021 Sep 30;13(10):1971. doi: 10.3390/v13101971 (PMC8537636; doi:10.3390/v13101971)
Supplement: Supplementary file 1 [file viruses-13-01971-s001.zip › Table S2.xlsx]

## Sheet: SI2
Supplementary Information 2. Viral DNA and RNA quantifications. For each sample the ID, description, DNA quantification data (viral copies per ng of DNA, logarithmic transformation, average per time point and standard deviation) and RNA quantification data (viral reads, total reads, percentage of viral reads, average per time point and standad deviation) are reported. The samples in bold are the …
ID	Description	DNA				RNA
		Copies/ng	Logarithm	Average per time point	Dev. St.	Viral reads	Total reads	On Target reads (host + virus)	On Target reads (%)	% viral reads	Average per time point	Dev. St.	Hyper-editing level
H6-1	H. diversicolor infected with HaHV-1 6_hpi	21.2944	1.32827	1.46652	0.167992	323	58371990	\	\	0.000553348	0.000428281	0.000282746	0
H6-2	H. diversicolor infected with HaHV-1 6_hpi	26.1703	1.41781			63	60247496	\	\	0.000104569			0
H6-3	H. diversicolor infected with HaHV-1 6_hpi	45.0281	1.65348			331	52797322	\	\	0.000626926			0
H12-1	H. diversicolor infected with HaHV-1 12_hpi	156.194	2.19366	2.37661	0.15986	3829	53171972	\	\	0.00720116	0.00538114	0.00396894	0
H12-2	H. diversicolor infected with HaHV-1 12_hpi	308.582	2.48937			3590	44246326	\	\	0.00811367			0
H12-3	H. diversicolor infected with HaHV-1 12_hpi	279.766	2.4468			390	47068612	\	\	0.000828578			0
H24-1	H. diversicolor infected with HaHV-1 24_hpi	96857	4.98613	5.25218	0.258935	371156	46040682	\	\	0.806148	1.22988	0.465134	0.0325975
H24-2	H. diversicolor infected with HaHV-1 24_hpi	318684	5.50336			801146	46374514	\	\	1.72756			0.0327507
H24-3	H. diversicolor infected with HaHV-1 24_hpi	184952	5.26706			610728	52834484	\	\	1.15593			0.0495781
H36-1	H. diversicolor infected with HaHV-1 36_hpi	3.60545e+06	6.55696	6.62079	0.056181	20336823	45723904	\	\	44.4774	47.0602	4.44533	0.190344
H36-1_S	H. diversicolor infected with HaHV-1 36_hpi					20253510	45118654	\	\	44.8894			0.167647
H36-2	H. diversicolor infected with HaHV-1 36_hpi	4.59983e+06	6.66274			31486473	60326794	\	\	52.1932			0.181844
H36-3	H. diversicolor infected with HaHV-1 36_hpi	4.39196e+06	6.64266			24059035	54053176	\	\	44.5099			0.155265
H48-1	H. diversicolor infected with HaHV-1 48_hpi	8.4984e+07	7.92934	8.36841	0.445455	25292887	51870802	\	\	48.7613	52.9109	11.6289	0.622062
H48-2	H. diversicolor infected with HaHV-1 48_hpi	2.26938e+08	8.35591			26291403	59853896	\	\	43.926			0.700763
H48-3	H. diversicolor infected with HaHV-1 48_hpi	6.6067e+08	8.81998			36667620	55518872	\	\	66.0453			0.711356
H48-3_S	H. diversicolor infected with HaHV-1 48_hpi					33375732	51993326	\	\	64.1923			0.624912
H60-1	H. diversicolor infected with HaHV-1 60_hpi	1.91369e+08	8.28187	8.72668	0.385221	4301893	50368168	\	\	8.5409	35.3733	24.194	1.01205
H60-2	H. diversicolor infected with HaHV-1 60_hpi	8.83564e+08	8.94624			31292951	56358236	\	\	55.5251			1.01429
H60-3	H. diversicolor infected with HaHV-1 60_hpi	8.95194e+08	8.95192			19985090	47522618	\	\	42.0538			0.734238
O6_1	S. broughtonii infected with OsHV-1 6_hpi	1.31222	0.118007	0.284028	0.237969	0	89943142	77920704	86.6333	0	5.06498e-06	8.77281e-06	0
O6_2	S. broughtonii infected with OsHV-1 6_hpi	1.50458	0.177415			0	137353352	125141124	91.1089	0			0
O6_3	S. broughtonii infected with OsHV-1 6_hpi	3.60297	0.556661			16	119612326	105298154	88.0329	1.51949e-05			0
O12_1	S. broughtonii infected with OsHV-1 12_hpi	7.51073	0.875682	0.759131	0.122548	6	95080784	83351080	87.6634	7.19847e-06	4.24925e-06	3.77121e-06	0
O12_2	S. broughtonii infected with OsHV-1 12_hpi	5.8932	0.770351			0	108728498	95120973	87.4849	0			0
O12_3	S. broughtonii infected with OsHV-1 12_hpi	4.27916	0.631359			6	124108144	108121890	87.1191	5.54929e-06			0
O24_1	S. broughtonii infected with OsHV-1 24_hpi	9.16349	0.962061	1.27284	0.282884	62	129590038	112237589	86.6097	5.524e-05	0.000100736	4.39194e-05	0
O24_2	S. broughtonii infected with OsHV-1 24_hpi	32.7582	1.51532			145	115802622	101478372	87.6305	0.000142888			0
O24_3	S. broughtonii infected with OsHV-1 24_hpi	21.9356	1.34115			116	125806820	111451789	88.5896	0.000104081			0
O36_1	S. broughtonii infected with OsHV-1 36_hpi	143.978	2.15829	1.96461	0.168713	157	101494752	83978391	82.7416	0.000186953	0.00269392	0.00267547	0
O36_2	S. broughtonii infected with OsHV-1 36_hpi	76.8963	1.88591			5130	109481234	93088626	85.027	0.00551088			0
O36_3	S. broughtonii infected with OsHV-1 36_hpi	70.7348	1.84963			2318	111778108	97234463	86.9888	0.00238393			0
O48_1	S. broughtonii infected with OsHV-1 48_hpi	23350.8	4.3683	3.82169	1.27865	520403	83125846	69846353	84.0248	0.745068	0.314936	0.372512	0.105842
O48_2	S. broughtonii infected with OsHV-1 48_hpi	54473.3	4.73618			107951	121501210	105659008	86.9613	0.102169			0.0363501
O48_3	S. broughtonii infected with OsHV-1 48_hpi	229.398	2.36059			134114	152806180	137452157	89.952	0.0975714			0.0659394
O60_1	S. broughtonii infected with OsHV-1 60_hpi	624203	5.79533	5.35784	0.403568	2337776	95911706	83222092	86.7695	2.80908	1.85741	1.05829	0.377392
O60_2	S. broughtonii infected with OsHV-1 60_hpi	189708	5.27808			794632	127471508	110716920	86.8562	0.717715			0.115001
O60_3	S. broughtonii infected with OsHV-1 60_hpi	100022	5.0001			1346550	78924676	65831737	83.4108	2.04544			0.0728152
O72_1	S. broughtonii infected with OsHV-1 72_hpi	371145	5.56954	5.7789	0.34742	3767647	78933546	57411571	72.7341	6.56252	8.29114	1.6504	1.06988
O72_2	S. broughtonii infected with OsHV-1 72_hpi	1.51333e+06	6.17993			5419205	77520300	55015939	70.9697	9.85025			1.04164
O72_3	S. broughtonii infected with OsHV-1 72_hpi	386554	5.58721			4589991	73078100	54250991	74.237	8.46066			0.502048
