# Supplementary material for: Viral Decoys: The Only Two Herpesviruses Infecting Invertebrates Evolved Different Transcriptional Strategies to Deflect Post-Transcriptional Editing
Source: Viruses. 2021 Sep 30;13(10):1971. doi: 10.3390/v13101971 (PMC8537636; doi:10.3390/v13101971)
Supplement: Supplementary file 1 [file viruses-13-01971-s001.zip › Table S3.xlsx]

## Sheet: SI4
Supplementary information 4
HaHV-1 genome annotation
ORF name	Gene name	Strand	Gene length [bp]	Polycistronic	No. of transcripts	Transcript name	Transcript length	3'-UTR [bp]	5'-UTR [bp]	TATA box	polyA signal	ORF length [bp]
ORF1	1.5aspc	+	3785	Y	2	1.5asc	951	82	62	Y	Y	807
emb-1						1.5aspc	3785	82	1890	Y	Y	399
ORF3	7.2spc	+	2142	Y	1	7.2spc	1107	58	635	n	Y	414
ORF4		+								n	Y	438
ncRNA	7.2asnc	-				7.2asnc
ncRNA	9.7asnc	-				9.7asnc
ORF5	10.6spc	+	3163	Y	1	10.6spc	2554	109	366	n	Y	2079
ORF6		+						109		Y	Y	792
ORF7	14.3aspc	-	2906	Y	3	14.3asc_ORF7	1144	23	98			1023
ORF8		-				14.3aspc_ORF7-8	1740		1269			471
ORF9		-				14.3aspc	2906		1718			1188
ORF10	14.2sc	+	3133	n	1	14.2sc	1390	54	142	n	Y	1194
ORF11	15.5spc	+	3458	Y	2	15.5spc	3458	74	657	Y	Y	2727
ORF12		+				15.5sc_ORF12	793	74	47	n	Y	672
ORF13	19.0asc	-	1710	n	1	19.0asc	1092	52	71	Y	Y	969
ORF14	21.7aspc	-	5685	Y	2	21.7aspc	573	91	14	n	Y	468
ORF15						21.7asc_ORF14	5685	91	926	n	Y	4668
ncRNA	22.0asnc	-
ORF16	30.9aspc	-	4136	Y	2	30.9asc_ORF16	1156		160	Y	Y	996
ORF17		-				30.9aspc	4136		1184	n	Y	2952
ORF18	31.0asc	-	1985	n	1	31.0asc	1985	51	116			1818
ORF19	33.1asc	-	6251	n	1	33.1asc	2626	70	78	Y	Y	2478
ORF20	35.7spc	+	4196	Y	2	35.7spc	2662	140	1997	Y	Y	525
ORF21		+				35.7sc_ORF21	1897	92	110	Y	Y	1695
ORF22	38.3sc	+	2467	n	1	38.3sc	2467	40	21	Y	Y	2406
ORF23	40.9asc	-	4759	Y	1	40.9asc	3590	96	2483	Y	Y	1011
ncRNA	40.8snc	+
ORF24	42.3asc	-	4304	n	1	42.3asc	3387	111	96	n	Y	3180
ncRNA	43.0asnc	-
ORF25	47.6aspc	-	3638	Y	2	47.6asc_ORF25	942	83	64	Y	Y	795
ORF26		-				47.6aspc	3638		1079	n	Y	2559
ORF27	50.2sc	+	3705	n	1	50.2sc	2111	85	94	Y	Y	1932
ORF28	52.3asc	-	3327	n	1	52.3asc	3327	67	-10	Y	Y	3270
ORF29	55.5spc	+	5101	Y	1	55.5spc	3439	45	766	Y	Y	2628
ORF30		+							-735	Y	Y	735
ORF31	59.3asc	-	3105	n	1	59.3asc	3091	418	75	n	Y	2598
ORF32	62.0asc	-	4940	n		62.0asc	4940	114	596	Y	Y	4230
new1	66.2asc	-	2904	n	1	66.2asc	2904	2202	66	Y	Y	636
ORF33	67.1aspc	-	3334	Y	2	67.1asc_ORF33	1902	128	643	Y	Y	1131
ORF34						67.1aspc	3334		1480	Y	Y	1854
ncRNA	69.6snc	+
ORF35	72.1aspc	-	3871	Y	1	72.1aspc	3871	38	2876	n	Y	957
ORF36		-							-2808			2808
ORF37	75.1sc	+	5468	n	1	75.1sc	5468	381	125	Y	Y	4962
ORF38	80.5asc	-	3912	n	1	80.5asc	3912	52	20	n	Y	3840
ORF39	87.1aspc	-	8924	Y	3	87.1aspc_ORF39-40	2469		1200	n	Y	1269
ORF40		-				87.1aspc			-1122	n	Y	1122
ORF41		-				87.1aspc_ORF41	6273		2847	Y	Y	3426
ORF42	90.7spc	+	4242	Y	1	90.7spc	2415	29	838	Y	Y	1548
ORF43		+							-702	Y	Y	702
ORF44	94.9aspc	-	5501	Y	2	94.9aspc	1399		61	n	Y	1338
ORF45		-					4054		151	Y	Y	3903
ORF46	100.7aspc	-	2508	Y	3	100.7aspc	701	56	45	n	Y	600
ORF47		-				102.5asc_ORF47	1035		33	Y	Y	1002
ORF48		-				102.5asc_ORF48	781		241	n	Y	540
ORF49		-							-1263	n	n	1263
ORF50	102.5aspc	-	3314	Y	1	102.5aspc	2235		1926	n	n	309
ORF51	102.9asc	-	1946	n	1	102.9asc	1946	121	43	Y	Y	1782
ORF52	104.8asc	-	2833	n	1	104.8asc	2078	67	1213	n	Y	798
ORF53	105.9sc	+	5146	n	1	105.9sc	1319	200	99	Y	Y	1020
ORF54	109.6asc	-	2443	n	1	109.6asc	1647	38	88	Y	Y	1521
ORF55	111.4sc	+	3547	n	1	111.4sc	941	72	62	Y	Y	807
ORF56	114.1asc	-	2054	n	1	114.1asc	1801	93	148	n	Y	1560
ORF57	116.9sc	+	3041	n	1	116.9sc	1511	45	185	n	Y	1281
ORF59	121.2sc	+	3068	n	1	121.2sc	1385	85	-59	Y	Y	1359
ORF60	123.7asc	-	3112	n	1	123.7asc	2514	39	1218	Y	Y	1257
ORF61	125.3spc	+	4342	Y	2	125.3spc	2260		1624	n	Y	636
ORF62		+				125.3sc_ORF62	1420		412	Y	Y	1008
ORF63	127.2sc	+	2011	n	1	127.2sc	1910	55	124	Y	Y	1731
ORF64	129.1sc	+	2865	n	1	129.1sc	2822		77	n	Y	2745
ORF65	132.4aspc	-	4265	Y	2	132.4asc_ORF65	614		104	n	Y	510
ORF66		-				132.4aspc	4265		698	n	Y	3567
ORF67	137.3aspc	-	3159	Y	2	137.3asc_ORF67	1012	69	58	n	Y	885
ORF68		-				137.3aspc	3159		1161	n	Y	1998
ORF69	139.3sc	+	3933	n	1	139.3sc	911		122	Y		789
ORF70	140.9aspc	-	2800	Y	2	140.9asc_ORF70	1774	78	1102	Y	Y	594
ORF71		-				140.9asc_ORF71	1998		111	Y	Y	1887
ORF72	142.9sc	+	2418	n	1	142.9sc	894	57	102	Y	Y	735
ORF73	144.8sc	+	3312	n	1	144.8sc	3076	114	384	Y	Y	2578
ORF74	148.6aspc	-	1452	Y	2	148.6asc_ORF74	641	76	55	n	Y	510
ORF75		-				148.6asc_ORF75	876	74	91	n	Y	711
ORF76	149.6sc	+	1456	n	1	149.6sc	887	82	64	n	Y	741
ORF77	150.5aspc	-	3022	Y	1	150.5asc_ORF77	1097	88	130	n	Y	879
ORF78	151.4spc	+	5237	Y	3	151.4sc_ORF78	1907	421	64	n	Y	1422
ORF79		+				151.4sc_ORF78-79	3448	94	1575	Y	Y	1779
ORF80		+				151.4sc_ORF80-82	1874		902	n	n	972
ORF81		+							-393	n	Y	393
ORF82		+							-321	n	Y	321
ORF83	156.6asc	-	3883	n	1	156.6asc	2670	117	366	n	Y	2187
ORF84	158.8sc	+	3445	n	1	158.8sc	2145	55	872	Y	Y	1218
ORF85	161.4aspc	-	3448	Y	2	161.4asc_ORF85	1219	77	-7	n	n	1149
ORF86		-				161.4aspc	2112		1110	n	Y	1002
ORF86_new	ORF86_new	-								n	n	1119
ORF88	163.5sc	+	5928	n	1	163.5sc	5928	51	96	Y	Y	5781
ncRNA	169.3asnc	-	691
ORF89	170.5asc	-	3977	n	1	170.5asc	3325	66	58	Y	Y	3201
ORF90	174.0spc	+	6539	Y	2	174.0sc_ORF90	1375	67	633	Y	Y	675
ORF91		+				174.0sc_ORF91	1612	30	85	n	Y	1497
ORF92	176.3asc	-	4557	n	1	176.3asc	1434	32	133	n	Y	1269
ORF93	177.8sc	+	2304	n	1	177.8sc	2068	108	49	Y	Y	1911
ORF94	179.9sc	+	1760	n	1	179.9sc	1350	46	65	n	Y	1239
ORF95	181.3asc	-	2676	n	1	181.3asc	1503	99	72	n	Y	1332
ORF96	182.7spc	+	3275	Y	1	182.7spc	1894	77	1196	n	Y	621
ORF97		+							-1041	n	Y	1041
ORF98	184.6aspc	-	4122	Y	1	184.6aspc	2253	64	83	n	Y	2106
ORF99		-							-1947	n	Y	1947
ORF100	188.7sc	+	2456	n	1	188.7sc	550	75	106	Y	Y	369
ORF101	189.3asc	-	1149	n	1	189.3asc	1149	171	102	n	Y	876
ORF102	190.3sc	+	2615	n	1	190.3sc	1502	44	63	n	Y	1395
ORF103	191.8asc	-	3459	n	1	191.8asc	2804	60	854	n	Y	1890
ORF104	193.9sc	+	1309	n	1	193.9sc	1309	88	96	n	Y	1125
ORF105	195.2asc	-	2291	n	1	195.2asc	2023	81	-5	n	Y	1947
ORF106	197.5spc	+	3493	Y	2	197.5spc	799	51	28	Y	Y	720
ORF107	198.4asc	-	3314	n	1	198.4asc	931		-11	Y	Y	942
ORF108		+				199.5sc_ORF108	1197	48	42	n	n	1107
ORF109	201.8asc	-	3743	n		201.8asc	1473	63	51	n	Y	1359
ORF111	206.2asc	-	1956	n	1	206.2asc	1956	66	609	n	Y	1281
ORF112	208.6sc	+	2035	n	1	208.6sc	2035	90	385	n	Y	1560
TOTALS			3314		98		1910	116.987	352.889	48	99	1218
B. OsHV-1 genome annotation
ORF name	Gene name	Strand	Gene length [bp]	Polycistronic	No. of transcripts	Transcript name	Transcript length	3'-UTR [bp]	5'-UTR [bp]	TATA box	polyA signal	ORF length [bp]
ORF1		-
ORF2		-
ORF3	2.0sc	+	1295	n	1	2.0sc	1047	48	309	Y	n	690
ORF4	3.5asc	-	3041	Y	1	3.5asc	3041	64	1927	Y	Y	1050
ORF6	6.4asc	-	2724	n	1	6.4asc	2724	58	635	n	Y	2031
ORF7	8.7sc	+	4417	n	1	8.7sc	3635	24	65	n	Y	3546
ORF8		-
ORF9.1	13.4aspc	-	4385	Y	1	13.4aspc	2136	135	1689	n	Y	312
ORF9.2		-										1227
ORF10	15.3sc	+	2837	n	1	15.3sc	1189	124	36	n	Y	1029
ORF11	16.6spc	+	4050	Y	1	16.6sc_ORF11	3359	37	34	n	n	3288
ORF12		+			1	16.6sc_ORF12	2159	25	1819	n	Y	315
ncRNA	16.4asnc	-	2305	n	1	16.4asnc	2305				Y	-
ORF13	20.6asc	-	1138	n		20.6asc	373	26	29	n	Y	318
ORF14	21.2sc	+	946	n	1	21.2sc	946	55	339	n	Y	552
ORF15	22.4spc	+	1967	Y	1	22.4spc	728	83	0	n	Y	645
ORF17		+
ncRNA	23.9snc	+	328	n	1	23.9snc	328			n	Y	-
new1	23.2asc	-	708	n	1	23.2asc	708	26	52	n	n	630
ORF19	24.3asc	-	1193	n	1	24.3asc	1193	0	59	n	Y	1134
ORF20	25.6aspc	-	5382	Y	2	25.6asc_ORF20	1877	103	34	n	Y	1740
ORF21		-				25.5asc_ORF21	3087	32	97	Y	Y	2958
ORF22	30.5sc	+	5090	n	1	30.5sc	5090	116	75	Y	Y	4899
ORF23	35.6asc	-	3923	n	1	35.6asc	3896	52	25	n	Y	3819
ORF24	39.5aspc	-	1988	Y	2	39.5aspc	1988	51	803	n	Y	1134
ORF25		-				39.5asc_ORF25	733	27	40	n	Y	666
ORF26	41.4sc	+	1342	n	1	41.4sc	1341	63	90	n	Y	1188
ORF27	42.7asc	-	916	n	1	42.7asc	916	79	36	n	Y	801
ORF28	43.6aspc	-	2955	Y	2	43.6aspc	2955	35	358	n	Y	2562
ORF29		-				43.6asc_ORF29	1964	1201	157	Y	n	606
ORF30	46.6asc	-	818	n	1	46.6asc	818	49	22	n	Y	747
ORF31	47.4asc	-	868	n	1	47.4asc	610	15	37	n	Y	558
ORF32	48.8sc	+	2585	n	1	48.8sc	2231	179	650	n	Y	1402
ORF33	50.4aspc	-	1453	Y	2	50.4asc_ORF33	1011	88	32	Y	Y	891
ORF34		-				50.4aspc	1453		1078			375
ORF35	51.8asc	-	1281	n	1	51.8asc	834	50	310	Y	Y	474
ORF39	53.5aspc	-	3824	Y	1	53.5aspc	3824	2	3237	n	Y	585
ORF40		-										1728
ORF41	55.9sc	+	2984	n	1	55.9sc	2984	50	15	n	Y	2919
ORF42	58.9asc	-	1158	n	1	58.9asc	1158	26	37	n	Y	1095
ORF43	60.1sc	+	714	n	1	60.1sc	714	62	40	n	Y	612
ORF125	60.8spc	+	2944	n	1	60.8spc	2944	50	1946	Y	Y	948
ORF126		+										648
ORF127		+										816
ORF44	63.8asc	-	1040	n	1	63.8asc	1040	52	61	Y	n	927
ORF45	64.8sc	+	829	n	1	64.8sc	829	69	34	n	Y	726
ORF46	65.7spc	+	4974	Y	3	65.7sc_ORF46	3780	3125	7	n	Y	648
ORF47		+				65.7spc	4974	54	681	n	Y	4239
						65.7sc_ORF47	4360	54	67	Y	Y	4239
ORF49	70.8sc	+	3492	n	1	70.8sc	3492	61	14	n	Y	3417
ncRNA	74.9snc	+	521	n		74.9snc		-	-	Y	Y	-
ORF51	75.6asc	-	2615	n	1	75.6asc	2615	47	60	Y	Y	2508
ORF52	78.2sc	+	2255									543
ORF53	78.8sc	+	1702									1548
ORF54	80.4sc	+	2486	n	1	80.4sc	2486	55	7	n	Y	2424
ORF55	82.9asc	-	518		1	82.9asc	518	36	62	n	Y	420
ORF56	83.6spc	+	1696	Y	2	83.6sc_ORF56	1570	690	31	Y	Y	849
ORF57		+				83.6sc_ORF57	1024	7	66	n	n	951
ORF58	85.2sc	+	1612	n	1	85.2sc	1612	35	11	Y	Y	1566
ORF59	86.8sc	+	3257	n	1	86.8sc	3257	7	7	n	Y	3243
ORF60	90.1aspc	-	3432	Y	1	90.1aspc	3432	19	2177	n	Y	1236
ORF60_2			-							n	n	n
ORF60_3			-							n	n	n
ORF62_1	92.6spc	+	2701	Y	1	92.6spc	1895	13	1168	n	Y	714
ORF62_2			+
ORF63_1	95.7spc	+	1914	Y	1	95.7spc	1914	49	1463	n	Y	402
ORF63_2			+
ORF64	97.3asc	-	1442	n	1	97.3asc	1348	104	47	n	Y	1197
ORF65_1	98.6aspc	-	2056	Y	1	98.6aspc	2056	104	689	Y	Y	1263
ORF65_2			-
ORF66	100.6asc	-	3516	n	1	100.6asc	3516	73	50	Y	Y	3393
ORF67	104.4sc	+	2147	n	1	104.4sc	2147	59	297	Y	Y	1791
ORF68	106.3asc	-	2116	n	1	106.3asc	2116	0	25	n	Y	2091
ORF69
ORF70	109.9asc	-	3979	n	1	109.9asc	1118	33	71	n	Y	1014
ORF71	111.2spc	+	2982	Y	2	111.2spc	2892	49	1481	Y	Y	1362
ORF72		+				111.2sc_ORF72	683	49	67	n	Y	567
ORF73	113.1snc	+	1796	n	1	113.1snc	427			Y	Y
ORF74	115.0asc	-	418	n	1	115.0asc	418	36	25	n	Y	357
ORF75	115.5asc	-	758	n	1	115.5asc	758	23	24	n	Y	711
ORF76	116.6sc	+	2427	n	1	116.6sc	2427	62	328	Y	Y	2037
ORF77	118.7sc	+	3872	n	1	118.7sc	3872	50	27	Y	Y	3795
ORF78	122.8spc	+	4412	Y	2	122.8spc	4412	85	1102	Y	Y	3225
ORF79		+				122.8spc_ORF79-80	1003	85	477	Y	Y	441
ORF80	126.6spc	+	2116	Y	3	126.6spc	2116	69	1696	n	Y	351
ORF81		+				126.6spc_ORF81-82	1592	69	881	Y	Y	642
ORF82		+				126.6sc_ORF82	1026	69	66	n	Y	891
ORF83	128.6aspc	-	1592	Y	2	128.6aspc	1592	57	428	n	Y	1107
ORF84		-				128.6asc_ORF84	466	51	58	n	Y	357
ORF85	130.1spc	+	3005	Y	3	130.1spc	3005	32	969	Y	Y	2004
ORF86		+				130.1spc_ORF86-87	1015	32	575	n	Y	408
ORF87		+				130.1sc_ORF87	566	32	21	n	Y	513
ORF88	133.1spc	+	3115	Y	2	133.1sc_ORF88	2301			n	Y	2247
ORF89		+				133.1sc_ORF89	823		88	n	Y	735
ORF90	136.2aspc	-	2208	Y	2	136.2aspc	2208		113	n	Y	885
ORF91		-				136.2asc_ORF90	998		868	Y	Y	1083
ORF92	138.4aspc	+	1951	Y	3	138.4aspc	1951	40	866	n	Y	690
ORF93						138.4asc_ORF93	1596	294	87	n	n	1215
ORF94	140.4sc	+	1034	n	1	140.4sc	1034	40	121	n	Y	873
ORF95	141.3sc	+	1004	n	1	141.3sc	1004	28	43	Y	Y	933
ORF96	142.4asc	-	717	n	1	142.4asc	717	10	20	n	Y	687
ORF97	143.2asc	-	653	n	1	143.2asc	653	17	90	n	Y	546
ORF98	144.2sc	+	2252	n	1	144.2sc	2252	78	419	Y	Y	1755
ORF99	146.3asc	-	6505	n	2	146.3asc	823	54	16	n	Y	753
ORF100	147.5sc	+	5726	n	1	147.5sc	5726		89	n	Y	5637
ORF101	153.3sc	+	623	n	1	153.3sc	623	13	10	n	Y	600
ORF102	153.9asc	-	2407	n	1	153.9asc	2407	66	52	n	Y	2289
ORF103	156.2sc	+	1451	n	1	156.2sc	1371	75	24	n	Y	1272
ORF104	157.7sc	+	3375	n	1	157.7sc	3775	77	86	n	Y	3612
ORF105	163.0asc	-	1783	n	1	163.0asc	1783		1783	Y	Y
ORF106	163.2asc	-	1494	n	1	163.2asc	1494	60		Y	Y	873
ORF107l	164.7spc	+	4699	Y	2	164.7spc(l)	2190	92	28	Y	Y	2070
ORF107s		+				164.7spc(s)	1226	92	30	n	Y	1104
ORF108	167.0sc	+	1832	n	1	167.0sc	1832	34	985	n	Y	813
ORF109	167.8spc	+	3582	Y	2	167.8spc	3582	73	884	n	Y	2625
ORF110		+				167.8sc_ORF110	906			n	Y	786
ORF111	171.4asc	-	982	n	1	171.4asc	982	46	66	n	Y	870
ORF112	172.4spc	+	2475	Y	3	172.4spc	2475	56	1030	Y	Y	1389
						172.4sc_ORF112	1912	452	71	Y	Y	1389
ORF113		+				172.4sc_ORF113	1055	56	42	Y	Y	957
ORF114	175.0sc	+	1484	n	1	175.0sc	1414	189	37	Y	Y	1188
ORF3	177.0asc	-	2793	n		/	/	/	/	/	/	690
ORF2	178.6sc	+	1340	n		/	/	/	/	/	/	504
ORF115		+
ncRNA	188.8asnc	-	1071
ORF116	184.6sc	+	1159	n	1	184.6sc	871	25		n	Y	771
ORF118	186.3asc	-	1695	n	1	186.3asc	882	171		Y	Y	669
ORF119	187.3sc	+	1971	n	1	187.3sc	862	39		Y	Y	759
ORF120
ORF121	189.8asc	-	723	n	1	189.8asc	723	3		n	Y	648
ORF122	191.3sc	+	1446	n	1	191.3sc	1446	28		Y	Y	1155
ORF124	188.9asc	-	2733	n	1	188.9asc	1533	31		Y	Y	1425
ORF121		+
ORF120		-
ORF119		-
ORF118		+
ORF116		-
TOTALS			1979.5		111		1581	109.798	401.837			948
