# Supplementary material for: Viral Decoys: The Only Two Herpesviruses Infecting Invertebrates Evolved Different Transcriptional Strategies to Deflect Post-Transcriptional Editing
Source: Viruses. 2021 Sep 30;13(10):1971. doi: 10.3390/v13101971 (PMC8537636; doi:10.3390/v13101971)
Supplement: Supplementary file 1 [file viruses-13-01971-s001.zip › Table S4.xlsx]

## Sheet: HaHV-1
SI7. Expression and hyper-editing. The expression levels as TPMs (log10) are reported for each transcript together with the cluster assigned in the expression trend analysis. For hyper-editing leves, the number of hyper-edited reads and the hyper-edited frequencies (computed as hyper-edited reads over 1,000 mapped reads) were reported (red and green columns, respectively).
Feature ID	Annotations - Gene title	24 - 24_1	24 - 24_2	24 - 24_3	36 - Hd-36I	36 - 36_2	36 - 36_3	48 - 48_1	48 - 48_2	48 - Hd-48I	60 - 60_1	60 - 60_2	60 - 60_3	Cluster	24_1	24_2	24_3	36_1	36_2	36_3	48_1	48_2	48_3	60_1	60_2	60_3	24_1	24_2	24_3	36_1	36_2	36_3	48_1	48_2	48_3	60_1	60_2	60_3
10.6spc	unkn	3.70155	3.68401	3.71252	3.04921	3.12351	3.18297	3.12744	3.26678	3.12211	3.23889	3.20711	3.15237	3	0	0	0	4	5	7	24	48	26	10	54	27	0	0	0	0.20762	0.187723	0.296623	0.933162	1.3504	0.759767	1.85219	1.56631	1.38164
101.2aspc	unkn	3.65987	3.61044	3.63289	3.90414	3.92819	3.93652	3.86211	3.83999	3.91109	3.87677	3.91968	3.92199	5	0	0	0	44	51	36	186	144	306	51	317	102	0	0	0	1.16119	1.09311	0.979778	4.85095	3.94186	5.29265	7.91925	6.49018	3.2304
102.8asc_ORF47		3.82211	3.78244	3.74982	3.96125	3.88283	3.87856	3.98942	3.96583	3.9895	3.98104	3.96544	3.99187	1	0	0	0	38	45	25	131	115	205	23	218	91	0	0	0	0.595527	0.725187	0.526637	1.72598	1.59574	2.00479	1.90256	2.72058	1.66186
102.8asc_ORF48		3.99709	3.99697	3.94132	4.20006	3.96577	4.0118	4.25367	4.15994	4.17335	4.17116	4.16077	4.12447	1	0	0	0	0	2	0	27	26	41	8	72	31	0	0	0	0	0.0352864	0	0.256539	0.305774	0.347953	0.566051	0.759414	0.552831
102.8aspc	PD-(DE)-XK exo	3.82668	3.83753	3.84093	3.67239	3.91547	3.89713	3.72489	3.69294	3.80545	3.79177	3.79077	3.815	1	0	1	0	87	176	85	382	361	696	114	671	409	0	0.343643	0	1.228	1.21835	0.794482	4.28607	4.34872	4.81568	6.75275	5.79818	5.19788
104.7asc	unkn	3.43956	3.47089	3.56872	2.78429	3.25749	3.26017	3.1176	3.24573	3.24895	3.31384	3.25448	3.28704	1	0	0	0	0	2	1	12	17	14	0	17	8	0	0	0	0	0.0723746	0.0465528	0.626403	0.658889	0.400859	0	0.580244	0.393953
105.6asc	unkn	3.92207	3.94081	3.87199	3.40829	3.61036	3.62506	3.55558	3.6298	3.57982	3.69301	3.61179	3.62682	1	0	0	0	20	45	23	113	140	172	39	216	112	0	0	0	0.557849	0.676498	0.432656	2.01397	2.09782	2.15223	3.11925	3.03154	2.36142
105.9sc	unkn	4.19761	4.16648	4.22655	3.54497	3.74538	3.80072	3.57996	3.67046	3.62558	3.73275	3.66136	3.66567	3	0	0	1	9	2	6	4	31	7	0	23	7	0	0	0.303674	0.288674	0.0347084	0.118652	0.106182	0.666394	0.124191	0	0.453694	0.212617
111.1asc	unkn	3.49269	3.45911	3.52854	0	0	0	0.171661	0	0	0	0.134206	0	2	0	0	0	0	0	0	0	0	0	0	0	0	0	0	0	0	0	0	0	0	0	0	0	0
111.4sc	IAP	4.0474	4.10533	3.948	3.56479	3.41855	3.60303	3.42578	3.35303	3.2113	3.04176	3.22154	3.16267	3	0	0	0	0	0	0	0	1	0	0	0	0	0	0	0	0	0	0	0	0.0625978	0	0	0	0
115.7asc	unkn	3.1137	3.64757	2.84612	3.06543	2.81625	2.92529	3.05441	3.19592	3.05262	3.29644	3.12286	3.08969	1	0	0	0	0	0	0	0	11	0	0	0	0	0	0	0	0	0	0	0	0.516674	0	0	0	0
116.9sc	unkn	4.06513	4.27953	4.17108	3.50743	3.56928	3.67751	3.43908	3.55882	3.30661	3.86689	3.4407	3.43106	3	0	0	0	0	0	0	0	0	0	0	0	0	0	0	0	0	0	0	0	0	0	0	0	0
121.1sc	unkn	2.22794	0	1.92339	2.19217	2.26058	2.25437	2.37223	2.50909	2.4471	2.44851	2.46267	2.39227	5	0	0	0	0	0	0	0	56	0	0	0	0	0	0	0	0	0	0	0	16.6716	0	0	0	0
125.0asc	unkn	3.54745	3.53052	3.56596	2.9251	3.10324	3.11658	3.0834	3.16317	3.15621	3.26238	3.18326	3.19807	3	0	0	0	22	26	32	139	159	172	43	243	124	0	0	0	1.54429	1.03913	1.6053	6.07703	5.76965	4.72022	7.66488	7.56491	5.80198
125.3sc_ORF62		3.77491	3.73826	3.80244	3.89548	3.79564	3.78156	3.79408	3.76383	3.82155	3.78578	3.78683	3.79182	1	0	0	0	19	0	8	20	53	65	0	177	51	0	0	0	0.252522	0	0.153577	0.301173	0.853531	0.6821	0	2.42925	1.07609
125.3spc	unkn	3.18908	3.16353	2.56615	3.0523	3.26149	3.2647	3.20475	3.22544	3.19078	3.29749	3.246	3.27537	5	0	0	0	0	25	0	43	77	93	38	0	45	0	0	0	0	0.771843	0	1.58111	2.69268	2.62171	6.94952	0	1.9601
127.2sc	DUF1335-WSSV	3.9742	3.94607	4.03319	3.33774	3.41254	3.49539	3.38577	3.471	3.34414	3.43933	3.38877	3.38093	3	0	0	0	0	0	1	7	22	17	2	21	4	0	0	0	0	0	0.0275885	0.200705	0.517039	0.398276	0.312159	0.53596	0.161655
129.1sc	unkn	3.87217	3.88174	3.82335	3.89345	4.03094	4.02401	3.89072	3.87512	3.9085	3.84142	3.91627	3.89108	1	0	1	0	50	76	69	334	442	435	94	679	237	0	0.245821	0	0.335949	0.319384	0.381367	2.02585	2.77199	1.88017	3.93338	3.48048	2.00211
136.0asc_ORF65		0	0	0	0.236735	0.61393	0.804058	0.862437	1.4234	0.861826	1.44238	1.0818	1.13634	5	0	0	0	0	0	3	7	32	30	0	30	13	0	0	0	0	0	150	241.379	271.186	769.231	0	526.316	309.524
136.0aspc	major capsid	4.62796	4.64935	4.60272	4.52905	4.8289	4.81445	4.56645	4.56672	4.65737	4.56215	4.66909	4.65368	1	0	3	0	29	59	59	134	109	273	52	298	136	0	0.0831186	0	0.0297634	0.02606	0.0348726	0.113192	0.0917832	0.138861	0.273198	0.178132	0.130994
139.3asc_ORF67		4.27874	4.28484	4.35447	3.54431	3.56559	3.66601	3.31048	3.43655	3.1917	3.5544	3.30244	3.25265	3	0	0	0	0	0	0	0	0	0	0	0	0	0	0	0	0	0	0	0	0	0	0	0	0
139.3aspc	unkn	3.45742	3.52706	3.33243	3.26126	3.58191	3.54607	3.36273	3.44292	3.48021	3.47916	3.53964	3.53278	1	0	0	0	8	28	26	41	90	113	25	130	44	0	0	0	0.205957	0.295642	0.385917	0.749502	1.36432	1.16997	2.15239	1.41717	0.757824
139.3sc	zf-C3HC4	3.77179	3.75153	3.69582	4.12798	4.04925	4.03913	4.2088	4.22879	4.23004	4.26275	4.24561	4.20468	5	0	0	0	13	42	16	124	264	215	58	341	133	0	0	0	0.157666	0.524174	0.264563	1.11999	2.27148	1.37281	2.84928	2.53626	1.69043
14.2sc	unkn	3.74614	3.70606	3.72526	3.12652	3.27392	3.3052	3.20605	3.28705	3.22877	3.33917	3.2585	3.26535	3	0	1	0	13	20	12	38	39	68	9	80	42	0	0.747943	0	1.03751	0.97561	0.705011	2.26501	1.92403	2.85558	2.43112	3.78752	3.04392
14.3asc_ORF7		0	0	0	0.0979991	0	0	0	0	0	0.579433	0	0	1	0	0	0	0	15	1	24	29	16	14	4	3	0	0	0	0	0	0	0	0	0	3500	0	0
14.3aspc	unkn	3.7939	3.84641	3.72447	3.6598	4.03035	4.01686	3.78849	3.74984	3.90044	3.81067	3.90611	3.90836	1	2	1	0	39	36	37	111	76	188	19	263	107	1.21433	0.256476	0	0.431679	0.145709	0.19996	0.81946	0.611759	0.796202	0.820805	1.32734	0.835474
14.3aspc_ORF7-8		3.54743	3.68621	3.3344	3.80565	3.76904	3.75928	3.79679	3.8111	3.85658	3.87039	3.8322	3.86637	5	0	0	0	0	0	0	0	0	10	0	7	30	0	0	0	0	0	0	0	0	0.0779709	0	0.0697038	0.429418
142.8asc_ORF70		4.5961	4.6004	4.59395	4.54555	4.68132	4.66888	4.69721	4.7223	4.70346	4.70675	4.70266	4.68635	1	0	1	0	9	36	19	96	114	181	44	260	78	0	0.0747328	0	0.0214292	0.0538263	0.0378395	0.144611	0.161675	0.199517	0.399303	0.346667	0.167925
142.8asc_ORF71		3.96468	4.05808	3.89822	4.03255	4.32607	4.30151	4.21203	4.2002	4.29416	4.24543	4.3368	4.27438	5	0	0	0	27	35	23	90	102	169	13	242	79	0	0	0	0.186002	0.105288	0.0947684	0.367903	0.427379	0.424489	0.303037	0.665243	0.389935
142.9sc	unkn	4.41941	4.32433	4.42341	3.98439	3.76743	3.85723	3.54956	3.68158	3.47065	3.70376	3.54744	3.54607	3	0	0	0	21	12	5	26	47	35	11	65	17	0	0	0	0.361241	0.292042	0.12808	1.09216	1.45295	1.309	1.99492	2.45923	1.00342
144.8sc	unkn	3.84425	3.86749	3.87969	3.41134	3.56162	3.59962	3.54392	3.57577	3.54273	3.61147	3.5964	3.5761	1	0	0	0	2	9	1	35	35	16	5	34	23	0	0	0	0.0374223	0.102261	0.0134747	0.432879	0.401243	0.147313	0.325966	0.333998	0.368194
149.3asc_ORF74		3.64946	3.61071	3.59063	4.03767	3.88075	3.87175	3.94715	3.98827	3.95235	4.04264	3.96773	4.03002	5	0	0	0	13	8	5	40	30	66	6	72	46	0	0	0	0.275874	0.209167	0.172759	0.937954	0.638298	1.13525	0.69541	1.44323	1.24234
149.6sc	unkn	4.21826	4.19951	4.26058	3.59786	3.52528	3.63401	3.39866	3.50872	3.27326	3.5194	3.35518	3.35312	3	0	0	0	2	3	1	6	17	15	4	15	4	0	0	0	0.0844523	0.128529	0.0431704	0.359604	0.788717	0.890948	1.11794	0.890683	0.371126
15.5sc_ORF12		4.41973	4.19264	4.25235	4.91176	4.64118	4.64979	4.8844	4.88909	4.88137	4.83956	4.84064	4.83071	5	0	0	4	146	130	85	426	987	724	158	1019	357	0	0	1.90386	0.33464	0.476926	0.395713	0.932871	2.13277	1.18526	2.36255	2.21212	1.23312
15.5spc	unkn	4.18758	4.26099	4.15221	4.16739	4.44703	4.41962	4.16398	4.1577	4.24937	4.1235	4.24168	4.28303	1	0	5	1	136	327	183	669	804	1237	162	1461	661	0	0.418831	0.137457	0.396832	0.430193	0.33192	1.76498	2.14656	1.99025	2.88914	2.88877	1.84795
151.4asc_ORF75		4.65477	4.58715	4.61194	4.78534	4.5288	4.54432	4.63637	4.64369	4.58881	4.63804	4.626	4.60411	1	0	0	0	68	45	36	117	132	179	31	218	117	0	0	0	0.188766	0.193587	0.19342	0.410587	0.454334	0.520306	0.667384	0.70227	0.616448
151.4asc_ORF77		3.55474	3.48282	3.45844	3.85967	3.70002	3.70975	3.77365	3.76241	3.77639	3.78286	3.76562	3.7876	5	0	0	0	23	3	6	33	28	38	1	66	28	0	0	0	0.429698	0.0694927	0.175912	0.67424	0.585603	0.572755	0.123183	1.23123	0.772222
151.4sc_ORF78		0	0	0	0	2.67001	2.79173	0	0	2.19927	0	2.78746	0.273095	5	0	0	0	9	10	3	17	14	35	0	82	8	0	0	0	0	1.43062	0.419522	0	0	11.5321	0	8.38017	888.889
151.4sc_ORF78-79		4.29787	4.29107	4.2468	4.09712	4.32375	4.30665	4.10413	4.13959	4.19136	4.13129	4.18073	4.19845	1	0	0	0	3	20	13	51	100	75	21	47	67	0	0	0	0.010327	0.0350704	0.0306913	0.154969	0.279329	0.138397	0.36914	0.107305	0.228379
151.4sc_ORF80-82		4.18733	4.15306	4.13759	4.24583	4.23858	4.22237	4.23912	4.22997	4.24305	4.20548	4.23778	4.24569	1	0	0	0	162	131	120	426	409	613	86	525	270	0	0	0	0.728116	0.513927	0.632528	1.74435	1.70605	1.84663	2.34326	1.93275	1.5179
158.8asc	unkn	3.43249	3.50304	3.3333	3.48388	3.59984	3.58643	3.51286	3.51466	3.57572	3.49963	3.52541	3.56039	1	0	0	0	115	163	119	314	417	653	113	644	351	0	0	0	2.09751	1.9539	1.9043	4.80593	6.33989	6.41958	10.9805	8.58289	6.71192
158.8sc	unkn	3.74425	3.73649	3.67306	3.86517	3.95056	3.93851	4.06572	4.06938	4.08287	4.0554	4.08718	4.10328	5	0	0	1	25	47	27	133	248	219	27	322	138	0	0	0.668003	0.235865	0.312689	0.239052	0.709292	1.30817	0.833473	0.908082	1.46495	0.940849
162.4asc_ORF85		3.62708	3.62507	3.70752	3.26412	3.24636	3.29926	3.32803	3.39782	3.3193	3.39674	3.33699	3.39404	1	0	0	0	2	7	4	22	18	40	9	45	11	0	0	0	0.132556	0.414889	0.271665	1.12896	0.784519	1.55479	2.42784	2.02748	0.675842
162.4aspc	CL channel	4.21852	4.18946	4.22673	3.68774	3.86851	3.90442	3.78182	3.85181	3.82284	3.87712	3.85322	3.88678	3	0	0	0	13	35	20	133	87	171	31	299	135	0	0	0	0.187436	0.285679	0.194528	1.38513	0.769231	1.20293	1.59646	2.3679	1.53897
163.5sc	DNA pol-familyB	3.82769	3.9079	3.86964	3.1112	3.49754	3.53667	3.28897	3.42637	3.419	3.46686	3.45877	3.47343	3	0	0	0	6	18	12	46	49	71	13	95	63	0	0	0	0.116315	0.123004	0.0969932	0.531116	0.411215	0.451046	0.613584	0.664875	0.662921
170.0asnc		2.20782	2.62477	2.45363	2.42857	2.91495	2.96527	2.73933	2.90956	2.9567	2.9525	2.92573	3.02694	5	0	0	0	1	12	2	11	9	22	4	23	20	0	0	0	0.803213	2.693	0.517331	3.86779	2.13169	3.47881	5.29801	4.71601	5.05051
173.7asc	hel primase	3.69198	3.6477	3.63607	3.62312	3.76267	3.75735	3.76079	3.75592	3.77834	3.77469	3.78841	3.82578	1	2	1	1	236	251	137	599	595	855	152	967	578	1.35501	0.357654	0.469263	2.50821	1.6605	1.18761	4.15914	4.16737	4.23269	6.29478	5.64728	4.81659
174.0sc_ORF90		3.71526	3.72231	3.70757	3.7268	3.72425	3.72394	3.7703	3.7886	3.79697	3.87585	3.80922	3.87759	1	1	4	4	177	160	102	566	715	912	174	998	551	1.5528	2.91333	3.84986	3.58271	2.79642	2.30916	9.29759	11.2321	10.4593	13.804	13.4344	9.85442
174.0sc_ORF91		3.65224	3.60621	3.52989	3.66194	3.77545	3.75729	3.80111	3.80751	3.82977	3.80462	3.83028	3.82398	1	0	0	0	19	14	15	43	105	91	15	79	25	0	0	0	0.380891	0.185499	0.26824	0.56124	1.347	0.825427	1.19598	0.864153	0.431496
177.6asc	tRNA ligase	4.00702	3.94783	3.90694	4.04146	4.09492	4.10056	4.00417	3.99859	4.05422	4.03295	4.05881	4.05863	1	0	0	0	40	22	14	61	65	120	20	125	83	0	0	0	0.376134	0.157016	0.127664	0.560708	0.603668	0.729718	1.05955	0.908094	0.938118
177.8sc	YqaJ-like endo	4.08146	4.08713	4.10182	3.29959	3.52842	3.60469	3.41211	3.51884	3.39565	3.50678	3.46131	3.46353	3	0	0	0	31	36	9	42	72	59	15	77	46	0	0	0	1.11607	0.656767	0.178288	1.04676	1.39977	1.13379	1.85117	1.53576	1.41953
179.9sc	unkn	3.75003	3.66006	3.63294	4.01238	3.91792	3.89768	3.99405	4.0347	4.0077	4.01848	4.01753	4.03834	5	0	0	0	42	67	48	216	400	363	74	524	223	0	0	0	0.448574	0.763524	0.741817	2.15873	3.63121	2.60988	4.30533	4.44686	2.80538
182.7asc	unkn	4.1122	4.08148	4.1374	3.53166	3.58676	3.6389	3.41204	3.5321	3.36448	3.52658	3.43014	3.37412	3	0	0	0	12	7	11	40	32	50	7	60	39	0	0	0	0.34829	0.15362	0.277106	1.37188	0.830242	1.42045	1.13563	1.76913	2.03464
182.7spc	unkn	4.35752	4.32062	4.34217	4.2475	4.29985	4.3149	4.15703	4.12431	4.17165	4.1218	4.14327	4.19193	1	0	0	0	163	207	120	546	677	766	123	979	506	0	0	0	0.722089	0.697783	0.505749	2.67238	3.5638	2.69114	4.02079	4.43303	3.1856
186.7aspc	env fusion	4.07407	4.05704	4.03934	4.13128	4.36608	4.34029	4.26838	4.22727	4.33839	4.24358	4.331	4.32662	5	0	0	2	31	79	45	211	199	452	86	640	243	0	0	0.547196	0.150874	0.1922	0.150382	0.671818	0.694762	0.909321	1.78538	1.58117	0.943122
188.7sc	unkn	3.87484	3.81507	3.84092	4.38941	4.14774	4.15602	4.48697	4.52424	4.43967	4.50523	4.4305	4.46778	5	0	0	1	81	107	66	410	562	658	105	783	361	0	0	1.76991	0.891226	1.76306	1.38104	3.23257	4.05636	4.29459	4.88827	6.30171	4.14661
190-1asc	unkn	3.75299	3.71261	3.87714	2.89411	2.99524	3.05339	3.07739	3.24312	3.04284	3.2706	3.13721	3.12081	3	0	0	0	3	8	3	17	33	53	12	60	23	0	0	0	0.494886	0.897263	0.380904	1.64888	2.17922	4.13255	4.59242	4.54442	2.81346
190.1sc	unkn	3.428	3.46594	3.32388	3.47263	3.53816	3.52645	3.54475	3.58308	3.58413	3.57294	3.60476	3.61532	1	0	2	0	15	18	4	27	54	41	5	106	20	0	2.40674	0	0.499102	0.442098	0.130642	0.682577	1.24665	0.702753	0.729501	2.09184	0.599053
193.6asc	ATP dep DNA ligase	4.12999	4.14458	4.17876	3.29349	3.55132	3.62505	3.48834	3.59218	3.48731	3.59958	3.5406	3.57316	3	0	0	0	9	12	15	101	75	169	23	221	117	0	0	0	0.242352	0.153165	0.209112	1.55751	0.908243	1.93932	1.69055	2.70823	2.06864
193.9sc	unkn	3.80163	3.73985	3.87605	2.96664	2.99518	3.05562	3.02069	3.1564	2.97725	3.11833	3.02701	3.07457	3	0	0	0	10	21	17	62	68	99	16	125	38	0	0	0	1.22504	2.06774	1.88491	6.01533	4.81348	7.88154	7.63359	10.7131	4.53894
197.2asc	unkn	3.7648	3.72487	3.64811	3.92763	3.96763	3.95029	3.98378	3.97907	3.99572	4.00692	4.03111	4.0229	5	4	3	1	425	793	592	1675	1396	2701	356	3037	1491	3.76648	1.47638	0.750188	3.68189	5.37835	5.40881	11.4384	9.61287	13.3219	14.1946	16.6696	12.9701
197.5sc_OTF108		3.91399	3.86858	3.98387	3.07435	3.21173	3.26151	3.15823	3.2512	3.12174	3.22399	3.13792	3.15653	3	0	0	0	0	4	1	17	18	30	3	52	20	0	0	0	0	0.261489	0.0754489	1.31376	1.11996	1.87207	1.22699	3.77441	2.16286
197.5spc	unkn	4.56185	4.59491	4.65523	5.12375	5.10456	5.04999	5.11102	5.04069	5.05654	5.04897	5.01993	5.0374	5	0	1	0	82	182	131	354	464	435	80	543	263	0	0.168039	0	0.114492	0.227994	0.240857	0.456591	0.701897	0.472186	0.733044	0.774223	0.560189
199.3asc	guanylated kinase	4.26291	4.19327	4.30273	3.57913	3.50888	3.60871	3.39488	3.51746	3.32388	3.53389	3.39152	3.37714	3	0	0	0	9	10	4	16	16	30	3	35	16	0	0	0	0.37804	0.42389	0.174391	0.921606	0.693151	1.5108	0.772599	1.82102	1.33824
20.0asc	capsid VP23	4.56257	4.51408	4.50201	4.96588	4.86024	4.85562	4.91976	4.91287	4.92626	4.84465	4.88237	4.87823	5	0	0	9	325	391	203	1709	1447	2739	422	3658	1264	0	0	1.75063	0.477577	0.629039	0.427244	2.50523	2.14965	2.93643	4.52892	5.23844	2.84196
203.1asc	unkn	4.11648	4.09402	4.18824	3.44954	3.51613	3.57183	3.56187	3.66975	3.54359	3.68972	3.58946	3.58972	3	0	0	0	0	0	0	0	33	0	0	0	0	0	0	0	0	0	0	0	0.636267	0	0	0	0
207.4asc	unkn	3.27066	3.40663	3.29008	2.80122	3.13697	3.14617	3.07336	3.17154	3.14913	3.26823	3.2118	3.2108	1	0	0	0	0	0	0	0	53	0	0	0	0	0	0	0	0	0	0	0	2.42463	0	0	0	0
208.6sc	unkn	4.24039	4.41656	4.40503	3.47179	3.75133	3.8119	3.51632	3.64179	3.40878	3.83247	3.55658	3.59409	3	0	0	0	0	0	0	0	37	0	0	0	0	0	0	0	0	0	0	0	0.550718	0	0	0	0
26.4asc_ORF14		4.5997	4.62805	4.57403	5.08422	4.85319	4.89035	5.01701	4.9583	4.94358	4.96572	4.94113	4.91835	5	2	0	0	208	191	99	940	797	1403	283	1837	784	1.07759	0	0	0.491597	0.659653	0.406271	2.32654	2.25244	3.05285	4.85429	4.8533	3.39469
26.4asnc		0.938227	1.31199	1.17665	1.24231	1.87583	1.83639	1.61306	1.70996	1.88227	1.78104	1.92034	1.92705	5	0	0	0	0	1	0	2	0	0	0	0	9	0	0	0	0	0.396511	0	1.53492	0	0	0	0	4.61302
26.4aspc	transmemb	3.73038	3.7672	3.68689	3.51829	3.75644	3.74244	3.48827	3.53873	3.59726	3.49936	3.59986	3.59358	1	0	0	0	15	10	5	52	56	73	18	112	28	0	0	0	0.118701	0.0392522	0.026236	0.395579	0.378304	0.320738	0.821993	0.590586	0.232959
30.9asc_ORF16		4.17004	4.15073	4.24104	3.25819	3.09427	3.26083	2.92264	3.21505	2.7963	3.29657	2.92173	2.86397	3	0	0	0	0	0	0	0	0	4	0	0	0	0	0	0	0	0	0	0	0	0.54727	0	0	0
30.9aspc	unkn	3.57084	3.7501	3.52764	3.43163	3.76178	3.77952	3.42296	3.48047	3.53332	3.49571	3.55468	3.61436	1	0	0	0	16	49	44	97	99	190	33	257	115	0	0	0	0.212486	0.261137	0.291368	1.17892	1.05127	1.32951	2.08887	2.06696	1.25367
32.8asc	similar to WSSV	3.74035	3.72468	3.79298	3.30262	3.46538	3.47338	3.35985	3.51656	3.40798	3.58694	3.51792	3.51066	1	0	0	0	14	7	1	21	26	34	7	38	24	0	0	0	0.521454	0.153836	0.0279267	0.615006	0.529381	0.661633	0.748263	0.693064	0.692221
35.6asc	ribon red-large	4.13292	4.16899	4.14615	3.59767	3.86261	3.8866	3.75816	3.80639	3.80748	3.87753	3.8923	3.89643	1	0	0	1	10	34	23	117	100	184	28	235	134	0	0	0.183554	0.142692	0.226252	0.187458	1.03488	0.789521	1.0785	1.1586	1.36794	1.20157
35.7sc_ORF21		4.39309	4.361	4.40434	3.40106	3.44456	3.64878	3.14249	3.42088	2.96726	3.22925	3.00686	3.10427	3	0	0	0	0	0	4	12	10	12	0	24	0	0	0	0	0	0	0.0780412	0.606765	0.265583	0.674574	0	1.4868	0
35.7spc	unkn	3.58798	3.74317	3.5496	3.44024	3.79929	3.78017	3.64998	3.73959	3.74177	3.78687	3.80403	3.82607	1	0	0	0	25	31	14	63	93	165	27	207	88	0	0	0	0.505715	0.235441	0.143826	0.705234	0.844786	1.10992	1.35801	1.45661	0.915341
38.3sc	envelop fusion	3.75356	3.81248	3.67086	3.69402	3.91034	3.92784	3.78053	3.75992	3.81543	3.7665	3.8319	3.89745	1	0	0	0	5	7	10	37	58	60	6	86	44	0	0	0	0.060831	0.0444213	0.0788967	0.330871	0.542502	0.367564	0.341278	0.612405	0.418988
40.8snc		3.36688	3.18228	3.55452	2.33273	0	0	0.858489	2.52185	0.720207	2.16883	0.383043	0.754233	2	0	0	0	22	20	30	94	174	147	46	132	116	0	0	0	11.3052	0	0	1492.06	51.6781	2534.48	190.871	8250	3411.76
41.9asc	helicase	3.64494	3.65894	3.58083	3.48325	3.47245	3.49736	3.52827	3.56085	3.51459	3.61746	3.57563	3.64141	1	0	0	0	48	74	28	141	124	225	22	355	220	0	0	0	0.652068	0.884681	0.409129	1.54906	1.26062	1.89384	1.21205	3.13446	2.59621
45.5asc	unkn	3.64598	3.56545	3.48376	3.17223	3.47277	3.44618	3.20213	3.19052	3.18756	3.21407	3.25445	3.28408	1	1	0	0	0	3	27	40	34	56	37	47	0	0.744048	0	0	0	0.0382239	0.473418	0.993517	0.865184	1.06783	5.50595	0.927516	0
45.5asnc		3.12194	3.20825	3.19665	2.83695	3.0732	3.10004	2.79893	2.91584	2.83856	2.84437	2.87165	2.93727	1	0	1	0	12	31	18	21	14	57	0	33	63	0	1.28535	0	1.01919	1.31106	0.926259	1.74665	0.88703	3.21217	0	2.08031	5.30929
50.1asc_ORF25		4.23671	4.20413	4.29194	3.49911	3.19999	3.41693	2.692	3.09035	0	2.99225	1.33012	0	2	0	0	0	0	0	0	0	0	5	1	5	0	0	0	0	0	0	0	0	0	0	0.886525	31.0559	0
50.1aspc	winged helix + DNA packaging term-large	3.41941	3.57742	3.26243	3.19757	3.55617	3.54051	3.33508	3.36087	3.41751	3.4085	3.46181	3.49557	1	0	0	0	16	27	14	52	37	89	15	90	59	0	0	0	0.414207	0.262669	0.182765	0.879716	0.588357	0.924464	1.31961	1.01919	0.961335
50.2sc	ribon red small	4.09306	4.08046	4.15551	3.19986	3.49037	3.55505	3.23242	3.37869	3.242	3.38865	3.28938	3.30149	3	0	0	0	12	7	3	11	15	22	1	28	11	0	0	0	0.532552	0.136564	0.0652713	0.406279	0.394529	0.59005	0.158705	0.812937	0.483007
55.5asc	dUTPase	3.65426	3.72541	3.58713	3.58679	3.86438	3.85283	3.61812	3.63328	3.68606	3.63713	3.7535	3.75773	1	0	0	0	24	74	57	95	130	197	29	230	124	0	0	0	0.277162	0.387086	0.396345	0.915671	1.20698	1.20547	1.64763	1.45477	1.20791
55.5spc	unkn	3.7895	3.80694	3.77512	3.55012	3.73321	3.72765	3.66687	3.69607	3.70586	3.68998	3.73074	3.73107	1	0	0	0	20	32	21	66	99	116	22	132	65	0	0	0	0.243137	0.219051	0.188466	0.550078	0.769488	0.65609	1.07066	0.851179	0.651348
61.9asc	unkn	3.80195	3.83721	3.76039	3.89097	4.08388	4.06378	3.96677	3.93673	3.99682	3.90314	3.97576	4.02402	1	0	0	0	21	56	24	162	117	269	48	365	202	0	0	0	0.130189	0.191121	0.111044	0.756642	0.58413	0.870367	1.59851	1.49671	1.15267
66.3asc	helicase	3.93491	3.98293	3.99433	3.349	3.6316	3.65459	3.49521	3.52501	3.53965	3.4788	3.61235	3.55459	3	0	0	0	0	2	2	15	17	18	6	29	22	0	0	0	0	0.0120438	0.014785	0.129235	0.136404	0.103927	0.330615	0.170989	0.230432
66.8asc	unkn	1.83657	2.14281	2.14793	1.4489	2.05986	2.10066	1.88182	2.04446	2.00184	2.04441	2.12941	1.9816	1	0	0	0	0	0	0	0	0	0	0	0	0	0	0	0	0	0	0	0	0	0	0	0	0
66.9asc_ORF33		3.23546	3.18033	3.09931	3.27527	3.12418	3.19521	3.29835	3.28983	3.25038	3.24758	3.25725	3.28254	1	0	0	0	9	7	0	26	0	0	0	9	4	0	0	0	0.372609	0.352361	0	0.915622	0	0	0	0.312294	0.203635
66.9aspc	unkn	3.35693	3.43653	3.41248	3.20881	3.2958	3.29324	3.27027	3.31509	3.29926	3.3177	3.35168	3.32366	1	0	0	0	10	12	16	52	58	143	29	184	70	0	0	0	0.27651	0.233105	0.404674	1.11956	1.12338	2.13793	3.44705	2.94348	1.8576
69.6snc		2.38392	2.58311	2.4692	2.12328	2.66704	2.6884	2.56609	2.75528	2.65777	2.74568	2.74191	2.72674	1	0	0	0	0	6	11	12	40	46	12	96	47	0	0	0	0	1.05448	2.38198	2.78229	5.97818	6.40758	11.3208	13.2964	10.4841
7.2asnc		3.88109	3.85832	3.86253	3.52223	3.34089	3.42271	3.28614	3.42174	3.19791	3.38683	3.19476	3.37483	3	0	0	0	2	4	4	4	16	2	0	12	12	0	0	0	0.14498	0.377965	0.405186	0.448079	1.30815	0.203811	0	1.48717	1.52749
7.2spc	euk trans init factor	3.86264	3.8837	3.79624	3.6348	3.54467	3.59249	3.57787	3.6284	3.52478	3.68174	3.57555	3.58941	1	0	0	0	45	66	66	181	231	294	56	382	176	0	0	0	1.39838	2.1667	2.51208	5.75261	6.51861	7.83895	8.62866	10.9402	7.59242
75.0aspc	unkn	3.74893	3.75212	3.71815	3.43332	3.64204	3.65101	3.53451	3.56926	3.58814	3.57636	3.59673	3.60163	1	0	0	0	7	27	15	85	82	191	22	205	96	0	0	0	0.0997137	0.204142	0.143798	0.86035	0.764212	1.26845	1.24533	1.6115	1.16043
75.1sc	unkn	4.24229	4.29619	4.30994	3.48277	3.80418	3.86267	3.55329	3.64201	3.5767	3.62423	3.63325	3.63096	3	0	0	0	17	27	16	77	132	139	26	103	82	0	0	0	0.151349	0.0984252	0.0659829	0.522764	0.728706	0.663801	0.923197	0.521355	0.648898
84.4asc	unkn	3.43418	3.4275	3.39951	3.58004	3.79828	3.75425	3.70006	3.70905	3.77654	3.63273	3.72795	3.73182	5	0	0	0	17	40	20	111	117	231	40	253	133	0	0	0	0.169583	0.207206	0.148413	0.753416	0.775893	0.976018	1.95246	1.44341	1.16957
9.7asnc		3.10695	3.19685	3.1481	2.89939	3.21164	3.17328	3.23749	3.352	3.28714	3.40467	3.37184	3.32858	1	0	0	0	12	22	8	58	54	87	6	81	34	0	0	0	0.719942	0.55171	0.283678	1.43213	1.02159	1.42238	0.620732	1.31547	0.948687
90.5aspc	archeo-euk primase-small	3.29647	3.42102	3.38218	3.52015	3.78419	3.78298	3.94478	4.03323	4.01842	4.01254	4.04214	4.03171	5	0	0	0	88	223	123	592	713	894	178	1336	483	0	0	0	0.441738	0.523091	0.374506	1.00257	0.982487	0.948667	1.58824	1.62064	0.933323
90.5aspc_ORF39-40		3.35037	3.2353	3.49446	3.00602	0	0	3.44362	3.6326	3.03413	3.4484	3.21686	2.86872	4	0	0	0	0	0	0	0	0	0	0	0	0	0	0	0	0	0	0	0	0	0	0	0	0
90.5aspc_ORF41		3.63727	3.57493	3.71501	1.94096	2.69934	2.64694	2.23106	2.36715	2.26421	2.50269	2.31207	2.40442	3	0	0	0	1	201	148	150	132	585	26	188	344	0	0	0	0.274048	8.16974	8.78703	18.8017	12.0449	50.4137	10.7084	17.5095	40.2433
90.7spc	ATP dep RNA helicase + herpes UL92	2.69195	2.31975	2.42561	2.78818	0.56692	0.579581	0	0	0.0953224	0	0.0600043	0	2	0	0	0	107	44	29	224	425	327	73	374	195	0	0	0	10.7214	862.745	707.317	0	0	54500	0	124667	0
98.8asc_ORF44		4.00057	3.9659	3.96078	4.29261	4.2652	4.22614	4.23051	4.19324	4.27146	4.24051	4.3007	4.24481	5	0	0	0	20	14	5	52	43	80	27	98	45	0	0	0	0.108115	0.0691966	0.0349988	0.290927	0.261473	0.302372	0.909091	0.418094	0.339571
98.8asc_ORF45		3.67835	3.70322	3.69763	3.38733	3.64073	3.62632	3.57896	3.58844	3.64727	3.60946	3.6724	3.65952	1	0	0	0	22	39	18	97	91	234	25	265	91	0	0	0	0.330097	0.280223	0.173055	0.839696	0.768795	1.2849	1.24236	1.65806	0.912116

## Sheet: OsHV-1
SI7. Expression and hyper-editing. The expression levels as TPMs (log10) are reported for each transcript together with the cluster assigned in the expression trend analysis. For hyper-editing leves, the number of hyper-edited reads and the hyper-edited frequencies (computed as hyper-edited reads over 1,000 mapped reads) were reported (red and green columns, respectively).
Feature ID	Annotations - Gene title	24 - P24_1	24 - P24_2	24 - P24_3	36 - P36_1	36 - P36_2	36 - P36_3	48 - P48_1	48 - P48_2	48 - P48_3	60 - 60I-Sb	60 - P60_2	60 - P60_3	72 - P72_1	72 - 72I-Sb	72 - P72_3	Cluster	48_1	48_3	60_1	60_2	60_3	72_1	72_2	72_3	48_1	48_3	60_1	60_2	60_3	72_1	72_2	72_3
100.5aspc	unkn	0	0	0	0	3.38269	4.45667	3.84682	3.70979	3.74563	3.87441	3.98453	3.60762	3.83188	3.74683	3.75836	2	0	0	21	2	0	39	55	20	0	0	2.577	0.558815	0	3.5275	3.64456	1.59604
104.4asc	archeo euk primase	4.7343	4.10931	0	0	3.14979	0	3.5209	3.51222	3.54261	3.35859	3.44188	3.61268	3.30529	3.19825	3.25765	5	1	0	12	1	0	55	97	24	0.74129	0	2.82486	0.570125	0	9.783	13.2986	3.54872
104.4sc	ATP dep helicase	0	0	0	0	3.66482	0	3.56746	3.58734	3.65259	3.45754	3.41251	3.66188	3.36055	3.20713	3.31009	1	2	1	2	0	0	9	10	8	2.18103	3.38983	0.613874	0	0	2.30828	2.19974	1.71674
108.3asc	envelop	0	0	0	4.51777	4.06882	0	4.26258	4.12572	4.12483	4.26209	4.25386	4.12413	4.25888	4.1218	4.2521	2	0	0	3	0	0	14	22	8	0	0	0.14642	0	0	0.460027	0.597031	0.198891
110.9asc	unkn	0	0	0	0	4.72628	0	4.09926	4.26943	4.25426	4.0117	3.98225	4.29958	3.78146	3.85283	3.87095	1	0	0	12	2	3	50	60	30	0	0	1.97401	1.03306	0.406064	9.34056	5.72792	3.39712
111.2sc_ORF72		0	0	4.13841	4.20622	3.53549	0	3.35833	3.32453	3.33454	3.29183	3.28147	3.33339	3.32928	3.17351	3.26494	4	3	0	85	1	10	162	250	110	3.93185	0	28.3712	1.00301	4.84262	33.1492	44.1151	19.4449
111.2spc	unkn	0	0	0	0	3.86117	0	3.98779	3.97917	3.93056	3.94117	3.96091	3.91694	4.15491	4.05344	4.11661	1	0	0	5	6	6	108	221	84	0	0	1.58378	5.3286	3.20856	13.9752	21.7584	8.84304
113.1snc	unkn	0	0	0	0	0	0	3.6625	3.90333	3.71667	3.50089	3.69204	3.94391	3.7397	3.63203	3.71497	1	0	0	0	0	0	1	1	1	0	0	0	0	0	0.538503	0.415628	0.424628
115.3asc	unkn	0	0	0	0	4.07439	0	3.88972	3.9228	3.96526	4.25094	4.07199	3.93825	4.28796	4.3209	4.26577	1	0	0	0	0	0	5	5	0	0	0	0	0	0	0.77821	0.43448	0
116.1asc	dUTPase	0	4.95175	0	4.48671	4.41794	0	4.0914	4.22394	4.18509	3.95632	3.97201	4.28583	3.85651	3.87045	3.93104	4	0	0	2	0	0	2	5	1	0	0	0.551268	0	0	0.463607	0.676041	0.145433
116.6sc	Yquai endo	0	4.27027	0	0	3.31067	0	3.35539	3.44462	3.47397	3.29385	3.30779	3.52878	3.27354	3.16848	3.23871	4	5	0	32	10	3	104	86	78	7.86164	0	12.6683	11.2486	1.10375	28.8328	18.294	17.4536
118.7sc	membrane	0	3.76643	0	3.7785	4.10763	3.70471	3.85476	3.81674	3.86163	3.71881	3.86751	3.89233	3.76076	3.60316	3.72543	2	0	0	4	2	0	23	40	14	0	0	0.37296	0.3885	0	1.3012	1.95944	0.639971
122.8spc	unkn	0	3.70974	0	3.72181	3.05128	0	3.665	3.61423	3.52705	3.68086	3.70665	3.52107	3.60094	3.53241	3.5731	4	0	0	0	0	0	14	16	9	0	0	0	0	0	1.00438	0.809594	0.512791
122.8spc_ORF79-80		5.27904	0	4.89931	4.36508	0	0	4.00337	4.0953	4.11638	4.04135	4.16963	4.09162	3.99623	4.13903	4.18274	5	0	0	13	0	0	23	81	13	0	0	2.22641	0	0	2.92063	4.45912	0.800295
126.6sc_ORF82		5.09311	4.34316	4.58844	4.35523	3.98546	4.28144	4.62594	4.6479	4.68863	4.64246	4.69203	4.47668	4.4221	4.5626	4.57246	3	0	0	0	1	0	0	0	0	0	0	0	0.109794	0	0	0	0
126.6spc	capsid	0	0	0	0	4.32428	0	4.33304	4.29929	4.31417	4.42691	4.29689	4.16804	4.39727	4.36428	4.35347	1	0	0	4	0	0	44	46	28	0	0	0.133636	0	0	1.05178	0.714563	0.551452
126.6spc_ORF81-82		0	0	0	0	0	0	0	1.89023	0	1.18298	1.86992	1.52125	3.08491	3.11973	3.14442	4	0	0	0	0	0	0	0	3	0	0	0	0	0	0	0	1.27173
13.8aspc		0	0	0	0	0	3.96301	3.69966	3.58314	3.49254	3.64842	3.68281	3.64231	3.70632	3.58764	3.6086	1	3	0	21	2	0	118	148	51	2.42522	0	4.17412	1.07759	0	13.7177	13.6205	5.53085
130.1asc_ORF84		0	0	0	4.69798	0	0	0	0	0	0	0	0	0	0	0	3	0	0	0	1	0	7	1	6	0	0	0	0	0	0	0	0
130.1aspc	unkn	0	0	4.69868	0	4.19259	0	3.9084	3.88611	3.83637	3.9773	4.0339	3.82831	4.0993	4.08484	4.12154	4	0	0	6	0	0	45	45	15	0	0	0.750281	0	0	2.83948	1.76817	0.669822
130.1sc_ORF87		0	0	5.1478	0	0	0	3.47639	3.86951	3.5542	0	0	3.48191	0	0	0	5	0	0	2	0	0	0	0	0	0	0	0	0	0	0	0	0
130.1spc	IAP	0	0	0	4.18957	3.6949	3.81478	3.89772	3.78871	3.76346	3.89323	3.889	3.71637	3.82357	3.76187	3.80182	2	0	0	14	0	0	36	67	25	0	0	1.12558	0	0	2.27086	2.93422	1.23499
130.1spc_ORF86-87		0	0	0	0	0	0	3.61619	3.35134	3.62209	3.59461	3.76795	3.36916	3.54159	3.50719	3.57816	1	0	0	0	0	3	8	0	0	0	0	0	0	3.81194	2.86021	0	0
130.2sc_ORF88		0	0	4.23769	4.00449	4.03263	0	4.19537	4.10003	4.10831	4.37752	4.19088	3.89872	4.12571	4.0801	4.07195	4	1	0	16	1	2	77	68	43	0.239636	0	0.550775	0.155231	0.331071	3.16326	1.8689	1.48923
130.2sc_ORF89		0	0	0	0	4.0812	4.85429	4.19753	4.10736	4.16498	4.32802	4.27692	4.1889	4.22105	4.29414	4.25162	2	0	0	1	0	0	15	7	1	0	0	0.107863	0	0	1.38325	0.328577	0.0640205
138.3asc_ORF90		0	4.35518	0	4.36725	4.39539	0	4.44257	4.45167	4.41137	4.43164	4.48601	4.40069	4.39205	4.29569	4.35377	4	0	0	0	0	1	0	0	0	0	0	0	0	0.120135	0	0	0
138.3aspc	unkn	0	0	0	0	3.65266	0	3.55625	3.64574	3.55979	3.43102	3.50128	3.62553	3.49544	3.35587	3.44935	1	0	0	3	0	0	15	5	4	0	0	0.951777	0	0	2.74173	0.759186	0.605602
140.2asc_ORF93		0	0	0	0	3.7936	4.08956	3.37345	3.46345	3.32871	3.56162	3.65874	3.44273	3.2389	3.11516	3.15261	2	0	0	10	1	0	3	22	7	0	0	3.24886	0.762195	0	1.36986	8.04682	2.90456
140.2aspc	unkn	0	0	0	0	0	4.30336	3.68287	3.55482	3.59727	3.51158	3.65059	3.44416	3.7755	3.68281	3.7723	1	0	0	0	0	0	21	17	5	0	0	0	0	0	2.27914	1.37574	0.407199
140.4sc	unkn	0	0	0	0	4.38	0	3.3152	3.23861	3.29954	3.19753	3.16568	3.44647	3.35712	3.26228	3.31941	1	0	0	1	0	0	5	8	7	0	0	1.16009	0	0	2.68384	3.21802	3.05277
143.0asc	zfC3HC4	0	4.49879	0	0	3.84008	0	3.64841	3.41683	3.5936	3.59024	3.62393	3.43769	3.68938	3.62114	3.70962	4	0	0	1	0	0	9	32	11	0	0	0.677048	0	0	3.24091	8.12183	2.81618
143.7asc	zfC3HC4	0	0	0	4.55146	0	0	3.83713	4.01466	4.0156	3.76978	3.75628	3.99845	3.66062	3.73989	3.72926	1	0	0	0	0	0	6	9	0	0	0	0	0	0	2.53485	1.90799	0
144.2sc	unkn	0	0	4.24704	0	3.64409	3.94004	3.81983	3.88734	3.88133	3.63997	3.69704	3.90322	3.55368	3.45607	3.53817	4	0	0	3	0	1	22	25	13	0	0	0.576701	0	0.167392	3.44774	2.95473	1.57271
147.0asc	IAP	0	0	0	0	0	4.6782	3.73916	3.87306	3.86398	3.93565	3.77927	3.86711	3.8027	3.93091	3.7636	1	0	0	4	0	0	6	7	5	0	0	1.06496	0	0	1.44998	0.758397	0.984834
147.5sc	DNA polymerase	4.04541	4.0736	3.84179	3.90959	4.05166	4.1368	3.70745	3.77282	3.77709	3.41687	3.54026	3.93654	3.26847	3.16066	3.2367	3	0	0	6	0	0	17	27	16	0	0	0.758342	0	0	2.02116	2.47866	1.52454
15.3sc	unkn	0	0	0	4.2912	4.39852	4.51842	4.10271	4.30438	4.27377	3.88662	3.89702	4.28398	3.70238	3.67491	3.81775	2	0	0	14	5	3	33	67	32	0	0	2.88838	2.95508	0.395778	6.95469	9.06018	3.85125
153.3sc	unkn	0	4.55981	0	0	0	0	3.07211	3.37143	3.46053	2.98738	3.20238	3.36369	3.12464	3.12472	3.11517	5	0	0	0	0	0	0	0	0	0	0	0	0	0	0	0	0
156.2asc	unkn	0	0	4.21813	3.98493	3.31427	4.21214	3.87533	3.77085	3.77059	3.87581	3.86133	3.72626	3.80125	3.78465	3.77144	2	0	1	3	0	2	27	33	13	0	2.30415	0.313447	0	0.47081	2.23843	1.71206	0.859845
156.2sc	unkn	0	4.21728	4.46256	0	3.55861	0	3.79328	3.87212	3.87446	3.79454	3.83337	3.77403	3.8525	3.87287	3.88868	5	0	0	4	0	0	19	22	6	0	0	0.88476	0	0	2.45764	1.63544	0.531868
16.4asnc		0	0	0	0	3.33306	4.23095	3.7651	3.35754	3.45734	3.86217	3.78581	3.30958	3.92274	3.92515	3.73018	2	0	0	0	2	2	29	61	6	0	0	0	0.787712	1.2837	1.89791	2.39122	0.455719
16.6sc_ORF11		0	0	4.07341	0	3.64654	0	3.19478	3.23576	3.12534	3.10757	3.14879	3.3412	3.13811	3.05342	2.98851	4	0	0	2	0	0	0	0	0	0	0	0.878735	0	0	0	0	0
163.0asc	unkn	0	0	0	0	4.14338	0	3.6533	3.71054	3.66999	3.31447	3.47501	3.9256	3.18942	3.11126	3.36314	1	0	0	3	0	0	7	8	4	0	0	1.54162	0	0	3.2066	2.64288	0.914704
164.0asc	IAP	0	0	0	0	3.82228	0	3.27323	3.51076	3.44411	3.09038	3.19908	3.39023	3.19245	3.09159	3.11924	1	0	0	9	0	0	13	14	8	0	0	9.24974	0	0	7.05755	5.77558	3.82958
164.7spc(l)		0	4.79201	4.56018	0	4.30935	4.25317	4.34317	4.319	4.33002	4.46427	4.39556	4.24802	4.50633	4.51427	4.51186	4	0	0	7	0	0	14	32	13	0	0	0.207334	0	0	0.251541	0.340024	0.17178
164.7spc(s)		0	0	0	5.12297	4.60705	4.90305	4.52218	4.32782	4.18192	4.62646	4.57497	4.20765	4.68386	4.70383	4.71807	2	0	0	0	0	0	0	0	0	0	0	0	0	0	0	0	0
167.0sc	unkn	4.84133	0	0	0	4.47401	4.02968	4.19084	4.22275	4.20002	4.15701	4.19324	4.20522	4.09992	4.00871	4.01947	4	0	0	1	0	0	5	8	1	0	0	0.0718391	0	0	0.273778	0.325508	0.049087
167.8sc_ORF110		0	4.87429	4.94349	0	4.58351	0	4.12273	4.26827	4.37231	3.61459	3.83512	4.37746	3.33632	3.53514	3.67372	5	0	0	0	0	0	0	0	0	0	0	0	0	0	0	0	0
167.8spc	DNA pack trm	0	0	0	3.8123	3.91961	3.73851	3.67944	3.60441	3.59295	3.66593	3.66218	3.48671	3.70034	3.5002	3.59831	2	0	0	0	0	0	3	5	5	0	0	0	0	0	0.210852	0.335616	0.331104
171.4asc		0	0	0	0	4.00449	0	3.93017	3.87745	3.90266	4.0425	3.95878	3.81966	4.09745	4.05107	4.07526	1	0	0	3	0	2	11	10	11	0	0	0.523378	0	0.930665	1.13006	0.688516	0.885882
172.4sc_ORF112		0	0	4.31811	4.08491	0	0	0	0	0	0	0	0	0	0	0	3	0	0	2	0	1	1	8	3	0	0	0	0	0	0	0	0
172.4sc_ORF113		0	0	0	0	0	0	3.38795	3.51059	0	0	3.15216	2.07269	0	0	0	4	0	0	0	0	0	0	0	0	0	0	0	0	0	0	0	0
172.4spc	capsid	0	0	0	0	4.38116	4.59797	4.52302	4.47307	4.49533	4.50001	4.59108	4.43963	4.42515	4.37838	4.42635	2	0	0	8	1	0	50	64	26	0	0	0.193101	0.0574251	0	0.958295	0.822823	0.370154
175.0sc	unkn	0	0	0	4.21594	0	0	3.23066	3.39867	3.50407	3.17416	3.12637	3.5038	3.44635	3.35333	3.34198	1	0	0	1	0	0	1	2	0	0	0	0.895255	0	0	0.319591	0.476985	0
18.5sc		0	4.02008	0	0	0	0	3.25311	3.27972	3.30432	3.24243	3.39911	3.4009	3.31779	3.34916	3.25018	5	0	0	2	0	0	23	45	15	0	0	1.002	0	0	6.4734	7.09667	3.67467
186.0asnc		0	0	0	0	0	0	3.22949	3.2331	3.41938	3.37538	3.24823	3.39483	3.67175	3.64327	3.6095	1	0	1	12	2	2	62	115	36	0	11.6279	8.92193	5.84795	2.27015	15.5662	18.5694	7.77034
186.3asc		0	0	0	4.42736	4.05758	0	3.71554	3.97148	3.93347	3.52518	3.58154	3.93161	3.66378	3.56448	3.58525	2	0	0	0	0	0	2	6	0	0	0	0	0	0	0.630318	1.43164	0
187.3sc		0	4.4188	0	4.43087	4.60513	4.65809	4.19418	4.4336	4.46381	4.04469	4.05526	4.54411	3.82266	3.98079	3.81559	2	0	0	0	0	0	1	3	3	0	0	0	0	0	0.220361	0.276651	0.500501
189.8asc		0	4.49517	4.74045	0	4.13746	0	3.81174	3.96518	4.0428	3.68227	3.74562	4.15944	3.77224	3.8205	3.73179	5	0	0	1	0	0	1	2	0	0	0	0.543183	0	0	0.295072	0.318066	0
191.3asc		0	4.16878	0	4.18085	4.11208	0	4.00149	4.10966	4.16847	3.91867	3.97505	4.37403	3.91151	3.83881	3.86419	4	11	1	41	6	2	221	221	185	6.18325	1.44718	6.09394	2.29797	0.16632	22.3165	15.8913	15.5175
194.4sc		0	4.19415	4.74045	0	3.53549	0	3.85733	3.93503	3.9119	3.82109	3.74382	4.09312	3.83423	3.83972	3.7903	5	0	0	2	1	0	27	39	15	0	0	0.394555	0.691563	0	3.45357	2.96691	1.58128
20.6asc		0	0	0	0	0	0	3.8876	3.91283	4.08271	4.46136	4.1624	3.80601	4.60366	5.02185	4.68742	1	0	0	4	0	1	2	22	6	0	0	0.70028	0	1.26422	0.16862	0.426514	0.310704
201.3asc		0	4.71531	0	4.42636	3.75559	4.65358	3.81044	4.14945	4.09566	3.54749	3.63506	4.15396	3.70895	3.82118	3.66908	2	0	0	0	0	0	2	0	0	0	0	0	0	0	0.566733	0	0
21.2sc	unkn	0	0	0	0	3.71972	0	3.01442	2.97642	3.11873	3.21551	3.12801	3.10922	3.3603	3.43834	3.33128	1	0	0	1	0	0	10	22	1	0	0	1.21655	0	0	5.82411	6.44783	0.463822
22.4spc	unkn	0	0	0	0	0	0	3.03886	2.92391	2.99524	3.34171	3.26745	3.07559	3.48377	3.79903	3.45475	1	0	0	1	0	0	9	6	0	0	0	1.18203	0	0	5.12528	0.995685	0
23.8asc	unkn	0	0	0	0	0	0	3.35881	3.61683	3.59908	3.18769	3.28133	3.73571	3.21855	3.35735	3.46149	1	0	0	0	0	0	4	2	1	0	0	0	0	0	4.31499	0.943841	0.459137
23.9snc		0	0	0	0	0	0	3.55139	3.58503	3.20302	3.77499	3.62765	3.57437	4.59385	4.52229	4.59585	1	0	0	0	0	0	1	5	1	0	0	0	0	0	0.0980681	0.348238	0.0727114
25.4asc	unkn	0	0	0	0	3.619	4.51696	3.57545	3.69723	3.83238	3.37619	3.3147	3.72472	3.29805	3.34029	3.25447	2	0	0	0	0	0	3	1	1	0	0	0	0	0	1.59915	0.29129	0.438982
2sc	unkn	0	0	0	0	3.97666	0	3.5464	3.66146	3.67363	3.53084	3.40158	3.81408	3.55679	3.44185	3.48307	1	0	0	0	0	0	0	0	0	0	0	0	0	0	0	0	0
3.4asc	unkn	0	0	4.1166	4.1844	3.81464	0	4.1017	4.07924	4.02098	4.20443	4.15023	4.08977	3.94708	3.93142	3.9801	4	0	0	16	0	1	36	62	24	0	0	0.620829	0	0.0806712	1.68848	1.81579	0.777076
30.3asc_ORF20		0	4.38187	4.62716	4.39394	4.26719	4.01914	4.18621	4.11631	4.1376	4.08913	4.12631	4.10728	3.98765	3.80985	3.89702	3	0	0	1	1	0	16	5	5	0	0	0.0819807	0.220799	0	1.10734	0.313893	0.317581
30.3asc_ORF21		0	0	0	4.35397	4.05113	4.10409	4.02538	3.85235	3.81108	4.06401	4.05981	3.78387	4.02999	3.87698	3.95247	2	1	0	11	1	2	39	49	19	0.264201	0	0.580965	0.15647	0.321492	1.48872	1.60251	0.645819
30.5sc	unkn	4.39755	3.64767	4.49494	3.65974	4.45123	4.18793	4.4183	4.4418	4.39089	4.06321	4.19475	4.58045	3.84137	3.79855	3.85687	3	4	1	29	2	5	115	147	53	0.259336	0.261165	0.930621	0.139101	0.0778537	4.11067	3.49285	1.36166
39.3asc	unkn	0	3.76375	4.009	0	0	0	3.80126	3.7307	3.69483	3.83919	3.85224	3.66024	3.72021	3.62035	3.68108	5	0	0	9	0	2	73	105	31	0	0	0.632067	0	0.338639	4.50617	4.91343	1.55983
41.3asc_ORF25		0	4.79022	0	0	0	0	3.72209	3.65291	3.78935	4.14085	3.9491	2.81643	4.27223	4.18114	4.21362	5	2	0	6	1	4	43	65	20	4.47427	0	1.11815	0.85034	25.1572	3.9573	4.44384	1.56912
41.3aspc	unkn	0	0	0	0	3.87429	0	3.77582	3.86252	3.84759	3.66449	3.66448	3.9458	3.59117	3.49351	3.48742	1	0	0	24	0	2	37	47	10	0	0	4.93929	0	0.34382	6.02508	5.77254	1.54036
41.4sc	unkn	0	0	0	0	3.56822	0	3.86367	4.01096	3.97483	3.79707	3.7837	4.11038	3.66684	3.6423	3.67554	1	0	0	1	0	0	9	12	3	0	0	0.22482	0	0	1.82519	1.55099	0.444181
43.5asc	unkn	4.84133	4.69343	0	4.7055	4.21078	4.93273	4.49607	4.39574	4.44416	4.53637	4.53067	4.29189	4.71058	4.62286	4.67325	3	0	0	2	1	1	8	9	6	0	0	0.119962	0.178317	0.168152	0.214713	0.178056	0.130719
46.4asc_ORF29		4.51009	4.53828	0	0	3.40256	0	2.92748	2.52171	3.14076	2.77904	2.80731	2.8953	3.1018	3.03517	3.079	5	0	0	1	0	1	9	16	7	0	0	1.60256	0	1.95695	4.58015	5.71837	2.79664
46.4aspc	unkn	0	0	4.12905	0	3.924	4.12307	3.95046	4.0673	4.01107	3.7562	3.91837	4.15161	3.5846	3.53347	3.58505	4	0	0	13	1	0	30	36	12	0	0	1.45724	0.226398	0	3.33667	2.71309	0.993131
47.3asc	unkn	0	0	0	0	0	0	3.09629	3.14414	3.01714	2.94946	3.16974	3.0869	2.93406	2.88533	2.88461	1	0	0	2	0	0	6	9	6	0	0	5.19481	0	0	10.7914	10.9091	9.00901
47.9asc	unkn	0	0	0	0	0	0	3.04326	2.86537	3.07126	3.12804	3.1781	3.03822	3.6185	3.52036	3.62545	1	0	0	2	0	1	7	5	2	0	0	4.60829	0	4.52489	3.48259	1.87829	0.729395
48.8sc	unkn	4.75576	0	0	0	3.34723	4.54613	4.19686	4.07853	4.02157	4.30241	4.30391	4.03432	4.15599	4.04563	4.16002	4	2	0	6	0	1	23	33	17	0.492611	0	0.253239	0	0.124938	0.908875	1.0127	0.495771
51.7asc_ORF33		0	0	0	0	4.16879	0	3.8028	3.91734	3.91891	3.72286	3.77575	3.94824	3.67699	3.68493	3.6861	1	1	0	4	0	1	0	8	0	1.34953	0	1.41794	0	0.336814	0	1.24572	0
51.7aspc	inactive dUTPase	0	4.19205	0	0	0	0	3.68739	3.5934	3.62418	3.79703	3.77828	3.65933	3.76622	3.70926	3.74355	5	0	0	0	0	0	3	0	3	0	0	0	0	0	0.446628	0	0.350508
52.5asc	unkn	0	0	0	0	3.77392	0	3.66064	3.84617	3.91509	3.5235	3.59668	3.89808	3.51212	3.59376	3.63753	1	0	0	0	0	0	0	1	0	0	0	0	0	0	0	0.232126	0
55.8aspc	unkn	0	0	0	3.78391	3.71516	0	3.78169	3.61473	3.63538	3.71688	3.71882	3.59681	3.7308	3.6364	3.66832	2	0	0	57	3	4	184	333	106	0	0	5.40541	0.831025	0.798563	11.2932	15.2998	5.59603
55.9sc	unkn	0	0	0	4.66972	3.99893	0	4.18344	4.12099	4.10756	4.36689	4.32656	4.13984	4.31346	4.33616	4.30745	2	4	2	28	8	9	198	339	96	0.759734	1.71086	0.761656	0.700648	0.659341	4.07064	3.98402	1.49059
6.4asc	unkn	0	0	0	0	3.26056	0	3.56916	3.61366	3.59263	3.5431	3.55589	3.63953	3.52942	3.39135	3.44745	1	0	0	14	0	0	59	67	22	0	0	2.78109	0	0	8.0833	7.59896	2.7117
60.0asc	IAP	0	0	0	0	3.9329	4.22888	3.61828	3.73892	3.81448	3.37471	3.43531	3.78985	3.47112	3.39685	3.46678	2	0	0	1	0	0	7	11	0	0	0	0.688705	0	0	2.58017	2.89779	0
60.1sc	unkn	0	0	0	0	0	0	4.00692	3.96529	3.93961	4.15764	4.0577	3.89557	4.05206	4.07936	4.05183	1	0	0	1	0	0	15	17	8	0	0	0.18406	0	0	2.35294	1.5083	0.935235
60.8spc	unkn	0	0	0	0	3.22685	4.12469	3.64406	3.58621	3.55891	3.82103	3.73503	3.54885	3.69055	3.69651	3.67271	2	0	0	16	1	1	50	64	21	0	0	1.55054	0.34662	0.289603	4.37331	3.32571	1.42557
64.7asc	small kinase	0	0	0	0	4.28058	0	3.81082	3.88692	3.84584	3.57658	3.59722	3.99866	3.60741	3.6949	3.74658	1	0	0	0	0	0	7	6	0	0	0	0	0	0	2.09895	0.88587	0
64.8sc	unkn	4.88467	4.91286	4.98206	4.92493	4.07804	4.85113	4.53295	4.46759	4.4575	4.6521	4.59339	4.43825	4.66774	4.63522	4.71243	3	0	1	13	3	3	40	69	36	0	1.37552	0.660032	0.511596	0.397931	1.3092	1.46603	0.791853
65.7sc_ORF46		0	0	0	4.08993	0	0	0	0	2.83528	2.45389	0	0	2.20498	2.97742	2.09307	3	0	0	0	0	0	10	0	4	0	0	0	0	0	20.9644	0	8.09717
65.7sc_ORF47		0	4.01588	0	0	3.05643	0	0.950949	0	0	0	0	3.03462	0	0	0	3	0	0	2	0	0	0	0	0	0	0	0	0	0	0	0	0
65.7spc	helicase	0	0	0	0	3.69788	4.19794	3.74587	3.74531	3.66793	3.56272	3.68631	3.73433	3.52302	3.39415	3.43802	2	0	0	0	0	0	18	41	19	0	0	0	0	0	1.37059	2.53024	1.31071
70.8sc	helicase	0	0	4.05654	0	0	0	3.49217	3.4592	3.4573	3.4338	3.47173	3.45742	3.41669	3.2642	3.35134	5	0	0	0	0	0	24	23	6	0	0	0	0	0	3.32548	2.72738	0.719856
74.9snc		0	0	0	0	0	0	2.71218	2.84745	1.80453	3.37784	2.76005	2.68261	3.52941	3.68348	3.37394	1	0	0	0	0	0	10	36	13	0	0	0	0	0	7.16332	10.8926	9.92366
78.0asc	ribonucl large	0	3.93687	0	4.24994	3.97708	0	3.92045	4.08241	4.07844	3.60351	3.70001	4.15468	3.57133	3.53242	3.55462	4	0	0	1	0	1	8	6	2	0	0	0.18005	0	0.0807885	1.03667	0.512208	0.200622
8.7sc	primase	0	0	0	0	3.61225	0	3.29245	3.20148	3.1796	3.30392	3.2974	3.26163	3.37616	3.18034	3.31032	1	0	0	0	0	0	14	12	4	0	0	0	0	0	2.04589	1.65837	0.506714
80.4sc	envelop	0	0	4.50512	4.27191	4.20315	0	4.18882	4.09535	4.10581	4.22034	4.25621	4.00731	4.21718	4.02307	4.18431	4	1	0	5	0	1	38	29	14	0.225175	0	0.228781	0	0.119318	1.17049	0.841262	0.346466
83.3asc	unkn	5.0889	0	0	0	4.58327	0	3.98144	4.12302	4.05307	3.85137	3.87457	4.14047	3.70128	3.81691	3.86457	4	0	0	0	0	0	2	1	1	0	0	0	0	0	0.969932	0.223814	0.248016
83.6sc_ORF56		0	0	0	4.64759	3.80073	0	3.87387	3.96988	4.01849	3.64702	3.75041	4.01985	3.65137	3.63348	3.6731	2	0	0	0	0	0	6	12	3	0	0	0	0	0	1.07701	1.35196	0.381534
83.6sc_ORF57		0	0	0	0	0	0	2.99141	2.74604	3.07277	2.88038	2.68858	2.66601	3.56976	3.55573	3.5774	1	0	0	0	0	0	10	17	11	0	0	0	0	0	3.32116	3.5124	2.6738
85.2sc	unkn	0	0	0	0	3.48831	0	3.50628	3.46291	3.47755	3.5925	3.52729	3.36606	3.54167	3.49789	3.53745	1	0	0	2	0	0	20	32	15	0	0	0.599161	0	0	4.50146	4.79832	2.53936
86.8sc	unkn	0	4.14253	0	0	3.65993	3.77982	3.83263	3.70092	3.73896	3.8317	3.83834	3.70496	3.78863	3.62523	3.74739	4	0	0	5	0	0	35	27	10	0	0	0.42735	0	0	2.20764	1.49444	0.516636
91.3aspc	unkn	0	0	0	0	3.16028	0	3.66712	3.43007	3.5244	3.84541	3.66359	3.38074	3.8421	3.79603	3.74393	1	0	0	47	5	3	117	277	82	0	0	3.69381	1.75254	1.09769	6.19211	9.81817	4.05258
92.6spc	unkn	4.82665	4.37773	0	4.08879	4.11693	4.316	3.8143	3.76646	3.79447	3.46686	3.67008	4.00808	3.54589	3.47171	3.52256	3	0	0	2	0	0	23	37	11	0	0	0.680735	0	0	4.36102	5.01287	1.63934
95.7spc	unkn	0	0	0	0	3.41376	0	3.50687	3.42456	3.46571	3.81209	3.66926	3.47252	3.78169	3.86101	3.83567	1	0	0	7	0	0	50	66	28	0	0	1.06512	0	0	5.45316	3.61169	2.00875
98.4asc	tRNA ligase	0	0	0	0	3.56596	4.1629	3.76766	3.89809	3.90601	3.55494	3.61848	4.04425	3.50111	3.50163	3.56802	2	0	0	2	0	0	7	13	1	0	0	0.78125	0	0	2.06856	2.31111	0.188679
mRNA3		5.00446	4.89132	4.86777	4.83084	4.85101	4.91977	5.05116	4.91567	4.91782	4.92811	5.02025	4.83553	4.87268	4.78343	4.82434	3	0	0	6	0	1	41	57	26	0	0	0.0354321	0	0.011669	0.183837	0.189059	0.0970609
mRNA86		0	0	0	0	0	0	3.51155	3.62483	3.57734	3.63428	3.61076	3.60365	3.69608	3.66096	3.6593	1	0	0	0	0	0	9	6	4	0	0	0	0	0	2.27906	0.992228	0.821187
mRNA90		0	4.45013	0	0	3.79143	0	2.48123	3.15272	3.12917	2.82606	2.81336	2.92606	3.47067	3.35765	3.59933	4	0	0	0	0	2	0	0	0	0	0	0	0	8.92857	0	0	0
